1 **RiboTag translaticomic profiling of *Drosophila* oenocytes under aging and oxidative stress**

2 Kerui Huang<sup>1\*</sup>, Wenhao Chen<sup>2</sup>, Fang Zhu<sup>3</sup>, Hua Bai<sup>1\*</sup>

3

4 1 Department of Genetics, Development, and Cell Biology, Iowa State University, Ames, IA

5 50011, USA

6 2 Department of Electrical and Computer Engineering, Iowa State University, Ames, IA 50011,

7 USA

8 3 Department of Entomology, Pennsylvania State University, University Park, PA 16802, USA

9

10 **\*Corresponding Authors:**

11

12 Kerui Huang

13 Phone: 515-294-3842

14 Email: keruih@iastate.edu

15

16 Hua Bai

17 Phone: 515-294-9395

18 Email: hbai@iastate.edu

19

20 **Running title:**

21 ***Drosophila* oenocyte RiboTag profiling**

22

23

24

25

26

27

28

29

30

31

## 32 **Abstract**

33 **Background:** Aging is accompanied with loss of tissue homeostasis and accumulation of  
34 cellular damages. As one of the important metabolic centers, aged liver shows altered lipid  
35 metabolism, impaired detoxification pathway, increased inflammation and oxidative stress  
36 response. However, the mechanisms for these age-related changes still remain unclear. In fruit  
37 flies, *Drosophila melanogaster*, liver-like functions are controlled by two distinct tissues, fat  
38 body and oenocytes. Although the role of fat body in aging regulation has been well studied,  
39 little is known about how oenocytes age and what are their roles in aging regulation. To address  
40 these questions, we used cell-type-specific ribosome profiling (RiboTag) to study the impacts of  
41 aging and oxidative stress on oenocyte transcriptome in *Drosophila*.

42 **Results:** We show that aging and oxidant paraquat significantly increased the levels of reactive  
43 oxygen species (ROS) in adult oenocytes of *Drosophila*, and aged oenocytes exhibited reduced  
44 sensitivity to paraquat treatment. Through RiboTag sequencing, we identified 3324 and 949  
45 differentially expressed genes in oenocytes under aging and paraquat treatment, respectively.  
46 Aging and paraquat exhibit both shared and distinct regulations on oenocyte transcriptome. Among  
47 all age-regulated genes, mitochondrial, proteasome, peroxisome, fatty acid metabolism, and  
48 cytochrome P450 pathways were down-regulated, whereas DNA replication and glutathione  
49 metabolic pathways were up-regulated. Interestingly, most of the peroxisomal genes were down-  
50 regulated in aged oenocytes, including peroxisomal biogenesis factors and beta-oxidation genes.  
51 Further analysis of the oenocyte transcriptome showed that oenocytes highly expressed genes  
52 involving in liver-like processes (e.g., ketogenesis). Many age-related transcriptional changes in  
53 oenocytes are similar to aging liver, including up-regulation of Ras/MAPK signaling pathway  
54 and down-regulation of peroxisome and fatty acid metabolism.

55 **Conclusions:** Our oenocyte-specific transcriptome analysis identified many genes and pathways  
56 that are shared between *Drosophila* oenocytes and mammalian liver, highlighting the molecular  
57 and functional similarities between the two tissues. Many of these genes are altered in both aged  
58 oenocytes and aged liver, suggesting a conserved molecular mechanism underlying oenocyte and  
59 liver aging. Thus, our transcriptome analysis will contribute significantly to the understanding of  
60 oenocyte biology, and its role in lipid metabolism, stress response and aging regulation.

61 **Keywords:** Oenocyte, Fat body, Liver, Ribosomal profiling, Peroxisome, Fatty acid beta-  
62 oxidation, Ras/MAPK signaling

## 63 **Introduction**

64           Aging is the major risk factor for many chronic diseases [1]. The prevalence of liver  
65 diseases, such as non-alcoholic fatty liver disease (NAFLD), increase dramatically in the elderly  
66 [2, 3]. It is known that aging is associated with alterations of hepatic structure, physiology and  
67 function [4]. For example, aged liver shows reduced blood flow, loss of regenerative capacity,  
68 decreases in detoxification and microsomal proteins synthesis, increases in polyploidy, oxidative  
69 stress and mitochondrial damage [5]. Additionally, the metabolism for low-density lipoprotein  
70 cholesterol decreases by 35% [3]. Age-related increases in neutral fat levels and high-density  
71 lipoprotein cholesterol predispose aged liver to NAFLD and other liver diseases. Accumulated  
72 evidence suggests that age-related decline of liver function can be attributed to increased ROS  
73 production, DNA damage, activation of p300-C/EBP-dependent neutral fat synthesis [6],  
74 decreases in autophagy, increases in inflammatory responses [7, 8], and activation of nuclear  
75 factor- $\kappa$ B (NF- $\kappa$ B) pathway [4, 9]. Despite the genetic and functional analysis of liver aging and  
76 liver diseases, only a few studies have looked at the global transcriptional changes during liver  
77 aging [10-12].

78           Similar to mammals, the fruit fly (*Drosophila melanogaster*, hereafter as *Drosophila*)  
79 also shows age-dependent decline of tissue function and loss of homeostasis (reviewed in [13]).  
80 In *Drosophila*, liver-like functions are shared by two distinct tissues, fat body and oenocytes  
81 [14]. Fat body is the main tissue for energy storage in insects, and it plays a key role in  
82 metabolism, nutrition sensing, growth and immunity (reviewed in [15]). Fat body has also been  
83 implicated in the regulation of organismal aging [16]. Many longevity pathways act on fat body  
84 to control lifespan [17-19]. Compared to fat body, little is known about how oenocytes age and  
85 what is the role of oenocytes in aging regulation. Oenocytes are specialized hepatocyte-like cells  
86 responsible for energy metabolism, biosynthesis of cuticular hydrocarbon and pheromone ([14,  
87 20], reviewed in [21, 22]). Oenocytes coordinate with fat body in mobilizing lipid storage upon  
88 nutrient deprivation [14, 23, 24]. Recent studies in the yellow fever mosquito *Aedes aegypti*  
89 showed that pupal oenocytes highly express cytochrome P450 genes, suggesting an important  
90 role of oenocytes in detoxification [25]. Despite its roles in lipid metabolism and wax  
91 production, we know very little about oenocyte's other physiological functions, including its role  
92 in the regulation of aging and longevity. It is known that aging oenocytes undergo dramatic  
93 morphological changes (e.g., increases in cell size and pigmented granules [26]) and exhibit

94 dysregulation of mitochondrial chaperone *Hsp22* [27]. However, transcriptional characterization  
95 of oenocyte aging has not been previously performed.

96 Here, we utilized RiboTag technique [28] to profile the genome-wide changes in  
97 ribosome-associated transcripts during oenocyte aging in *Drosophila*. We show that aging and  
98 paraquat (PQ) exhibit common and distinct regulation on adult oenocyte translome. Gene  
99 ontology and gene set enrichment analysis (GSEA) revealed that ribosome, proteasome,  
100 peroxisome, xenobiotic metabolism, fatty acid metabolism, and DNA replication pathways were  
101 altered under aging and oxidative stress. Comparing tissue-specific transcriptomes further  
102 revealed that oenocytes were enriched with genes involved liver-like functions (e.g.,  
103 ketogenesis). Aging oenocytes also shared many molecular signatures with aging liver. Taken  
104 together, our translome analysis revealed a conserved molecular mechanism underlying  
105 oenocyte and liver aging. Our study will offer new opportunities for future dissection of novel  
106 roles of oenocytes in lipid metabolism, stress response, and aging control.

107

## 108 **Results**

### 109 **Characterization of age-related changes in ROS production in *Drosophila* oenocytes**

110 In *Drosophila*, larval and adult oenocytes exhibit distinct morphological characteristics  
111 [21]. Larval oenocytes are clustering along the lateral body wall [14], while adult oenocytes  
112 (used in the present study) appear as segmental dorsal stripes and ventral clusters nearby the  
113 abdominal cuticle (Fig. 1A). As oxidative stress is commonly observed in aging tissue, we first  
114 examined the age-related changes in ROS production in adult oenocytes. As shown in Figs.  
115 1B&1C, both aging and PQ (an oxidative stress inducer) significantly increased ROS levels in  
116 adult oenocytes. Increases in cell and nuclear sizes were also seen in aged oenocytes (Figs. 1B,  
117 S1). In the present study, oenocytes were dissected from two ages, 10 days (young) and 30 days  
118 (middle age). Middle age was used because many epigenetic and transcriptional changes have  
119 been previously observed in the midlife [29-31]. Since elevated ROS levels were already  
120 apparent at middle age, a comparison between young and middle age will allow us to capture the  
121 early-onset age-related changes in adult oenocytes. Additionally, we noticed that young  
122 oenocytes showed much higher induction of ROS under PQ treatment than the oenocytes from  
123 middle age (Fig. 1C), suggesting the response to oxidative stress was altered in aged oenocytes.

### 124 **Oenocyte-specific translomic profiling through RiboTag sequencing**

125 Besides their roles in metabolic homeostasis, hydrocarbon and pheromone production  
126 (reviewed in [21]), the role of oenocytes in aging regulation has not been carefully examined.  
127 Characterization of age-related transcriptional changes in oenocytes is an important step toward  
128 our understanding of oenocyte aging. To date, only a few oenocyte transcriptome analyses have  
129 been reported [23, 25]. Most of these studies used dissected oenocytes, which often have issues  
130 with tissue cross-contamination. To overcome this issue, we performed an oenocyte-specific  
131 RiboTag analysis. In the analysis, oenocyte-specific driver *PromE-Gal4* was used to drive the  
132 expression of FLAG-tagged *RpL13A*. According to RNA-seq database (at Flybase.org) and a  
133 recent ribosomal proteome analysis [32], RpL13A is one of the highly and ubiquitously  
134 expressed components in *Drosophila* large ribosomal subunit. Our experimental design  
135 facilitates the enrichment of oenocyte-specific ribosome-associated mRNAs and translational  
136 profiling (Fig. 2A). To verify the efficiency and specificity of our RiboTag profiling, we  
137 performed a qRT-PCR analysis to measure the expression of *Desaturase 1 (Desat1)*. *Desat1* is a  
138 transmembrane fatty acid desaturase and its E isoform (*desat1-E*) was known to be specifically  
139 expressed in female oenocytes [20]. We found that the expression of *desat1-E* was much higher  
140 in anti-FLAG immunoprecipitated sample (oenocytes) compared to the input (whole body),  
141 suggesting that our RiboTag approach can effectively detect the gene expression from adult  
142 oenocytes (Fig. 2B).

143 To confirm the specificity of the RiboTag analysis, we measured the expression of a  
144 brain-specific gene, *insulin-like peptide 2 (Dilp2)*, and found that *Dilp2* expression in oenocyte  
145 RiboTag samples was very low compared to the head samples (Fig. 2C). Thus our RiboTag  
146 analysis has very little contamination from other tissues (such as brain). We also set up two  
147 control experiments to test the specificity of the reagents used in our pull-down assay: 1)  
148 Immunoprecipitation of *PromE>RpL13A-FLAG* expressing females using only protein G  
149 magnetic beads without adding FLAG antibody. 2) Immunoprecipitation of *PromE-gal4* flies  
150 using both Protein G magnetic beads and FLAG antibody. No detectable RNAs were pulled  
151 down from the two control groups, suggesting there is none or very little non-specific binding  
152 from FLAG antibodies or protein G magnetic beads during the immunoprecipitation (Fig. 2D).  
153 Notably, the total RNA pulled down from aged samples were less than those from young  
154 oenocytes. This is probably due to age-related decreases in general transcription and translation,  
155 because the *PromE-gal4* driver activity remained the same during aging (Fig. S1). Due to the

156 variation in RNA quantity among different samples, we used equal amount of RNAs for all  
157 library construction. To examine age- and stress-related transcriptional changes in *Drosophila*  
158 oenocytes, we performed RiboTag sequencing on four different experimental groups: H2O-  
159 Young, PQ-Young, H2O-Aged, PQ-Aged (see Methods for more details). Female flies were used  
160 in the present study, because previous studies showed that *PromE-gal4* drives expression in testis  
161 (additional to oenocytes) in male flies [20].

### 162 **Differential gene expression (DGE) analysis reveals common and distinct transcriptional** 163 **regulation by aging and oxidative stress**

164 Using Illumina sequencing (HiSeq 3000, single-end, a read length of 50 base pair), we  
165 obtained a total of 402 million reads from 12 library samples (about 11.6X coverage per library).  
166 On average, 82.43% of unique reads were mapped to annotated *Drosophila* reference genome.  
167 To visualize how gene expression varies under different conditions, we performed principal  
168 component analysis (PCA) on the fragments per kilobase million (FPKM) reads. The first  
169 component accounts for 50% of the variance and the second component accounts for 9% of  
170 variance (Fig. 3A). The PCA analysis showed that three replicates of each condition cluster  
171 together, except for one of the H2O-young samples. Two age groups were also well separated.  
172 Interestingly, there was a reduced variation between H2O and paraquat treatment in aged  
173 oenocytes compared to the young ones (Fig. 3A).

174 DGE analysis was performed using Cufflinks and Cuffdiff tools (fold change  $\geq 2$ , FDR  
175 adjusted p-value  $\leq 0.05$ , only protein-coding genes were analyzed). To compare the impacts of  
176 aging and oxidative stress on transcriptional changes in adult oenocytes, we first performed  
177 correlation analysis using Log-transformed FPKM reads from all four groups. The coefficient of  
178 determination ( $R^2$ ) was 0.861 between H2O-aged and H2O-young groups (Fig. 3B), 0.926  
179 between H2O-young and PQ-young (Fig. 3C), 0.948 between PQ-aged and H2O-aged (Fig. 3D).  
180 Aging induced a bigger transcriptional shift compared to paraquat treatment. Although the  
181 change of  $R^2$  was relatively small, the total number of age-regulated genes was much higher than  
182 that under paraquat treatment (Figs. 3E&3F). Thus, both PCA and correlation analyses suggest  
183 that aging and paraquat exhibit different impacts on oenocyte transcriptome.

184 DGE analysis identified 3324 genes that were differentially expressed during oenocyte  
185 aging (1092 up-regulated and 2232 down-regulated), while 949 genes (198 up-regulated and 751  
186 down-regulated) were regulated by paraquat treatment at young ages (Figs. 3E&3F) (Table S1:

187 List 1-4). About 706 DEGs were commonly regulated by aging and paraquat (127 up-regulated  
188 and 579 down-regulated) (Table S1: List 5-6). The genes commonly up-regulated by aging and  
189 PQ were involved in DNA metabolism, DNA repair and recombination (Fig. 3E), while those  
190 commonly down-regulated genes were involved in immune response and fatty acid elongation  
191 (Fig. 3F) (Table S2: List 1-4).

192 Besides common transcriptional regulation between aging and oxidative stress, many  
193 genes were differential regulated between the two processes. A total of 2618 genes (965 up-  
194 regulated and 1653 down-regulated) were only regulated by aging (Figs. 3E&3F) (Table S1: List  
195 5-6). Genes up-regulated in aged oenocytes were enriched in several Gene ontology (GO) terms,  
196 including developmental process, glutathione metabolism and metabolism of xenobiotics (Table  
197 S2: List 5). The down-regulated genes are enriched in peroxisome, ribosome, proteasome,  
198 oxidative phosphorylation, and fatty acid metabolism (Table S2: List 6). About 243 genes (71  
199 up-regulated and 172 down-regulated) were only regulated by paraquat treatment at young ages.  
200 These genes are enriched for biological processes like response to bacterium, response to other  
201 organism, and phototransduction (Table S2: List 7-8).

202 It is known that stress tolerance declines with age [33], which can be caused by impaired  
203 transcriptional regulation of stress signaling pathways [34]. Our transcriptome analysis showed  
204 that the total number of PQ-regulated genes decreased with aging (Figs. 3G&3H). About 949  
205 genes were differentially expressed under paraquat treatment at young ages (198 up-regulated  
206 and 751 down-regulated), while only 385 genes were differentially expressed at middle ages  
207 (213 up-regulated and 172 down-regulated) (Table S1: List 7-8). In addition, paraquat treatment  
208 targeted a different sets of the biological processes and signaling pathways between young and  
209 middle ages (Figs. 3G&3H). In young oenocytes, paraquat up-regulated pathways like response  
210 to DNA metabolism and DNA recombination, while down-regulating immune response, fatty  
211 acid biosynthesis, and fatty acid elongation (Table S2: List 9-10). In contrast, different sets of  
212 pathways were up-regulated by paraquat at middle ages, such as pheromone binding and cation  
213 channel activity. No pathway was found enriched for genes down-regulated by paraquat at  
214 middle ages (Table S2: List 11-12).

215 Next, we performed hierarchical clustering analysis and identified 11 distinct clusters  
216 among four groups (Fig. 3I). Among 11 clusters, cluster 3 and 5 are two major clusters. Cluster 3  
217 includes genes that were up-regulated in aged oenocytes compared to young ones. Gene ontology

218 analysis showed that cluster 3 was enriched with genes in endocytosis, hippo, JAK-STAT,  
219 fanconi anemia pathway, phosphatidylinositol signaling, and DNA replication (Fig. 3J). Cluster  
220 5 consisted of genes down-regulated by aging, and was enriched in fatty acid metabolism,  
221 oxidative phosphorylation, and proteasome (Fig. 3K). Taken together, our RiboTag analysis  
222 revealed common and distinct transcriptional changes under aging and oxidative stress in adult  
223 oenocytes.

## 224 **Gene set enrichment analysis (GSEA) reveals up- and down-regulated pathways in aged** 225 **oenocytes**

226 To further characterize oenocyte-specific signaling pathways that were regulated by  
227 aging and oxidative stress, we performed gene set enrichment analysis (GSEA) using a collection  
228 of pre-defined gene sets retrieved from Kyoto Encyclopedia of Genes and Genomes (KEGG)  
229 database. Through GSEA, we discovered five pathways within which genes were up-regulated  
230 with age (FDR  $q$ -value $<0.05$ ) (Figs. 4A&4C) (Table S2: List 13). They are mismatch repair,  
231 DNA replication, base excision repair, nucleotide excision repair, and fanconi anemia pathways.  
232 These pathways were tightly related to the cellular responses to DNA replication stress,  
233 suggesting a possible increased DNA replication stress during oenocyte aging. Several key  
234 players in DNA replication stress response were up-regulated aged oenocytes, such as ATR/mei-  
235 41 (ATM- and Rad3-related kinase) and TopBP1/mus101 (DNA topoisomerase 2-binding  
236 protein 1).

237 On the other hand, GSEA analysis revealed 14 pathways within which most of genes  
238 were significantly down-regulated during aging, such as oxidative phosphorylation, ribosome,  
239 proteasome, and peroxisome (Figs. 4B, 4D, 4E, 4F) (Table S2: List 13). These results suggest  
240 that the functions of many key cellular organelles/components (e.g., mitochondria and  
241 peroxisome) were impaired in aged oenocytes. In aged oenocytes, we found that the key  
242 components of all five complexes in mitochondrial electron transport chain were down-  
243 regulated, such as NADH dehydrogenase subunits (e.g., *ND-13*, *ND-15*, *ND-30*, *ND-B8*),  
244 succinate dehydrogenase (e.g., *SdhC*, *SdhD*), cytochrome bc1 complex (e.g., *Cyt-c1*, *UQCR-14*,  
245 *UQCR-C2*, *UQCR-Q*, *ox*), cytochrome c oxidase subunits (e.g., *COX4*, *COX5A*, *COX5B*), and  
246 ATP synthase subunits (e.g., *ATPsynB*, *ATPsynD*, *ATPsynF*, *ATPsynO*) (Table S1: List 2).  
247 Interestingly, we found that aging down-regulated many mitochondrial ribosomal subunit genes  
248 (44 out of 72 annotated mitochondrial ribosomal proteins) (Fig. 4I) (Table S1: List 2). Lastly, we



249 observed an age-related decrease in the expression proteasome subunit genes. These include 20S  
250 protein subunits (e.g., *Prosalpha2*, *Prosalpha3*, *Prosbeta1*, *Prosbeta2*, *Prosbeta3*), and 19S  
251 regulatory cap subunits (e.g., *Rpn1*, *Rpn11*, *Rpn12*, *Rpt1*, *Rpt2*, *Rpt3*) (Table S1: List 2). The  
252 analysis on peroxisome function is described in a following section.

253 Reduced xenobiotic metabolism is one of the hallmarks of liver aging [35]. Xenobiotics  
254 metabolism (or detoxification) consists of three major phases [36]. The Phase I and II enzymes  
255 represent the most abundant classes of detoxification system, including cytochrome P450 (CYPs)  
256 and glutathione S-transferases (GSTs). Interestingly, our GSEA analysis revealed distinct  
257 expression patterns for these two detoxification enzyme families. We found that almost all of the  
258 GSTs in Delta class were up-regulated under aging, while other classes showed mixed  
259 expression patterns (Fig. 4J) (Table S1: List 9). The microsomal glutathione S-transferase  
260 (*Mgstl*), one of the highly enriched oenocyte genes, was significantly down-regulated during  
261 oenocyte aging (Table S1: List 9).

262 On the other hand, most of the cytochrome P450 genes were down-regulated in aged  
263 oenocytes (Figs. 4H&4K). Many of the down-regulated CYPs have been previously linked to  
264 insecticide resistance or xenobiotic metabolism, such as *Cyp6a8*, *Cyp6a21*, *Cyp308a1*, *Cyp12a4*,  
265 *Cyp6a2*, *Cyp6w1*, and *Cyp313a1* (Table S1: List 10). Besides metabolizing exogenous  
266 chemicals, several CYPs catalyze endogenous metabolites and play key roles steroid hormone  
267 biosynthesis and fatty acid metabolism. For example, *Cyp4g1* is a key CYP gene involved in  
268 cuticular hydrocarbon biosynthesis [37] and triglyceride metabolism [14]. The expression of  
269 *Cyp4g1* was decreased in aged oenocytes (Table S1: List 10). About eight CYPs (also known as  
270 the Halloween genes) in *Drosophila* that are known to regulate ecdysteroid metabolism. Two of  
271 them, *Cyp306a1* (*Phantom*) and *Cyp315a1* (*Shadow*), were highly expressed in oenocytes (32-  
272 fold and 12.5-fold enriched respectively) (Fig. S2). During oenocyte aging, *Phantom* was down-  
273 regulated, whereas *Shadow* was up-regulated (Table S1: List 10).

#### 274 **Peroxisome pathway is transcriptionally deregulated in aged oenocytes**

275 Recent studies suggest that peroxisome protein import is impaired during aging [38]. Our  
276 GSEA analysis revealed that except for *Pex1* (up-regulated), most of the genes involved in  
277 peroxisome biogenesis (also called peroxin, *PEX*) were down-regulated in aged oenocytes (Figs.  
278 4F&5A) (Table S1: List 11). Out of 16 peroxin genes, five of them showed significant down-  
279 regulation during aging (fold change  $\geq 2$ , FDR adjusted p-value  $\leq 0.05$ ). They are matrix enzyme

280 import components (*Pex5*, *Pex12*), receptor recycling (*Pex6*), and membrane assembly  
281 components (*Pex16*, *Pex19*) (Figs. 5A&5B). In addition, most of the *PEX* genes were also down-  
282 regulated by paraquat treatment, but to a less extent comparing to aging (Fig. 5C).

283 Besides peroxisome biogenesis, genes involved in other peroxisomal functions were also  
284 down-regulated during oenocyte aging (Figs. 5D&5E) (Table S1: List 11). These functions  
285 include fatty acid beta-oxidation, ether phospholipid biosynthesis, amino acid metabolism, ROS  
286 metabolism, purine metabolism, and retinol metabolism. Several beta-oxidation genes showed  
287 significantly decreased expression, including sterol carrier protein X-related thiolases (*ScpX* and  
288 *CG17597*), enoyl-CoA hydratase (*ECH/CG9577*), carnitine O-acetyl-transferases (*CRAT* and  
289 *CG5122*), and nudix hydrolases (*CG10194*, *CG10195*, *CG18094*) (Fig. 5D). Consistently,  
290 hepatocyte nuclear factor 4 (*HNF4*), the major regulator for mitochondrial and peroxisomal beta-  
291 oxidation, was significantly down-regulated under aging and paraquat (Table S1: List 2). On the  
292 other hand, a few other beta-oxidative genes were up-regulated in aged oenocyte, such as ABC  
293 transporters (*Pmp70*, *CG2316*) that are responsible for transporting long-chain fatty acids into  
294 peroxisome, delta3-delta2-enoyl-CoA isomerase (*PECI/CG13890*), carnitine O-  
295 octanoyltransferase (*CROT/CG12428*). Acyl-CoA oxidases (*Acox*) that are involved in the first  
296 step of beta-oxidation showed mixed expression pattern (Fig. 5D).

297 Consistent with increased ROS production during oenocyte aging, most of the genes  
298 regulating peroxisomal ROS metabolism were down-regulated in aged oenocytes, such as  
299 *catalase* (*Cat*), *superoxide dismutase 1* (*SOD1*), *peroxiredoxin 5* (*Prx5*). Although the majority  
300 of ether phospholipid synthesis genes (e.g., fatty acyl-CoA reductase, *FAR*) were down-  
301 regulated, there are a few genes that showed up-regulation during aging, such as  
302 dihydroxyacetone phosphate acyltransferase (*DHAPAT* or *Dhap-at*), the key enzyme for the  
303 production of acyl-DHAP (the obligate precursor of ether lipids). Additionally, three aldehyde  
304 oxidases (*Aox1*, *Aox2*, *Aox4*) in purine metabolism were up-regulated (Fig. 5E).

305 To verify our RiboTag sequencing results, we performed qRT-PCR analysis on three  
306 selected peroxisome genes, *Pex5*, *Pex19*, and *Cat*. Consistent with RNA-Seq results, qRT-PCR  
307 showed that all three genes were significantly down-regulated in aged oenocytes (Figs. 5F-5H).

308 **Ketogenesis, fatty acid elongation, and peroxisome pathways are enriched in both**  
309 **oenocytes and liver**

310 Fat body, but not oenocytes, is a long-established tissue model to study liver- and  
311 adipose-like functions in *Drosophila* [39]. Although hepatocyte-like functions (e.g., steatosis)  
312 have been previously observed in oenocytes [14], it remains unclear whether fat body and  
313 oenocytes each perform different aspects of liver-like functions in *Drosophila*. To address this  
314 question, we performed a transcriptome comparison among *Drosophila* oenocytes, fat body, and  
315 human liver (Table 1).

316 We first identified genes that were enriched in adult oenocytes by comparing our  
317 oenocyte RiboTag data (H2O-Young group) with previously published whole body  
318 transcriptome data (Table S1: List 12). Fat body-enriched genes were identified based on  
319 *Drosophila* tissue transcriptome database, FlyAtlas [40, 41] (Table S1: List 13). The genes with  
320 more than 5-fold higher expression in oenocytes (or fat body) comparing to whole body are  
321 defined as oenocyte-enriched (or fat body-enriched) genes. A total of 423 oenocyte-enriched  
322 genes and 544 fat body-enriched genes were identified through tissue transcriptome comparison  
323 (Fig. S2). A recent study showed that *Drosophila* oenocytes express many liver-like lipid  
324 metabolic genes/pathways [14]. About 15 of these genes were also found enriched in our  
325 oenocyte transcriptome analysis (e.g., *Cpr*, *Cat*, *spidey*, *FarO*) (Table S1: List 16). About 463  
326 human liver-enriched genes were retrieved from the Human Protein Atlas [42] (Table S1: List  
327 15).

328 Interestingly, there was very little overlap between oenocyte-enriched and fat body-  
329 enriched genes, suggesting that adult fat body and oenocytes may regulate distinct biological  
330 processes (Fig. S2A) (Table S1: List 14). Gene ontology analysis revealed that fat body mainly  
331 expressed genes in carboxylic acid and amino acid metabolism, whereas oenocytes were  
332 enriched with genes in pathways like fatty acid biosynthesis, fatty acid elongation, proteasome-  
333 mediated protein catabolism, xenobiotic metabolism, ketone body metabolism, and peroxisome  
334 (Table 1) (Table S2: List 14-15). Furthermore, we found that two innate immunity pathways,  
335 Toll and Imd (Immune deficiency), were differentially enriched in fat body and oenocytes (Fig.  
336 S2B) (Table S1: List 12-13). Several genes in Imd pathway (*PRGP-LC*, *PRGP-LB*, *Dredd*) were  
337 enriched in oenocytes, whereas fat body were enriched with genes in Toll pathway (*Tl*, *PGRP-*  
338 *SA*, *GNBP3*, *modSP*) (Fig. S2B). Additionally, most of the antimicrobial peptides (AMPs) were  
339 enriched in oenocytes, but not in fat body (Fig. S2B)

340 When comparing oenocyte and liver transcriptomes, we found that several pathways were  
341 specifically enriched in both liver and oenocytes, such as long-chain fatty acid metabolism,  
342 peroxisome, and xenobiotic metabolism (Table 1, Table S2: List 14-16). A close look at the  
343 enriched genes shared between oenocytes and liver revealed that *HMG-CoA synthase* (*Hmgs* in  
344 fly and *HMGCS1/2* in human), the key enzyme involved in ketogenesis and production of  $\beta$ -  
345 hydroxy- $\beta$ -methylglutaryl-CoA (HMG-CoA), was highly expressed in both oenocytes and liver  
346 (Figs. 6A&6B). Additionally, two other ketogenesis genes were also highly expressed in both  
347 oenocytes and liver. They are *HMG-CoA lyase* (*CG10399* in fly and *HMGCL* in human) and *D*-  
348  *$\beta$ -hydroxybutyrate dehydrogenase* (*shroud* in fly and *BDHI* in human) (Figs. 6A&6B).  
349 Ketogenesis is primarily activated in mammalian liver, especially during fasting. These results  
350 suggest that oenocyte may be the fly tissue regulating ketogenesis similar to mammalian liver.

351 Microsomal fatty acid elongation and the synthesis of very-long-chain fatty acid  
352 (VLCFA) were also enriched in both oenocytes and liver (Figs. 6C&6D). Liver and oenocytes  
353 were enriched for very-long-chain 3-ketoacyl-CoA synthase (*ELOVL2* in human and *CG18609*  
354 in fly), which catalyzes the first step of VLCFA synthesis in smooth endoplasmic reticulum  
355 (smooth ER). Oenocytes also showed high expression of three other key enzymes in this process  
356 (*spidey*, *CG6746*, *Sc2*) (Figs. 6C&6D). The enrichment of fatty acid elongation factors in  
357 oenocytes aligns well with previously known oenocyte function in the biosynthesis of VLCFA  
358 and hydrocarbons [20, 24]. Notably, several key players involved in the production of cuticular  
359 hydrocarbons were enriched in adult oenocytes, including cytochrome P450 *Cyp4g1* (3.4-fold)  
360 and its obligatory redox partner, cytochrome P450 reductase *Cpr* (5.7-fold), as well as five  
361 peroxisome-localized fatty acyl-CoA reductases (FAR) (*FarO*, *CG13091*, *CG14893*, *CG17562*,  
362 and *CG4020*) (Table S1: List 11-12). In particular, *FarO* was 123-fold enriched in oenocytes,  
363 while *CG13091* was 243-fold enriched (Fig. S4).

364 Additionally, many oenocyte- and liver-enriched genes belong to peroxisome pathway,  
365 especially peroxisomal beta-oxidation (*CG17597*, *CG9577* in oenocytes, *ACOX2*, *BAAT*,  
366 *EHHADH*, *ACAA1*, *SLC27A2*, *ACSL1*, *PECR* in liver) (Fig. S4). Genes involved in ROS  
367 metabolism (e.g., *Cat*, *Sod1*) were also enriched in both oenocytes and liver (Fig. S4). Lastly, we  
368 found that fibroblast growth factor 21 (*bnl* in fly and *FGF21* in human), a key hormonal factor  
369 that regulates glucose homeostasis, was enriched in both oenocytes and liver (Table S1: List  
370 12&15). Taken together, our transcriptome analysis suggests that oenocytes and fat body regulate

371 distinct processes, and oenocytes may participate several liver-like functions (e.g., ketogenesis,  
372 and long-chain fatty acid metabolism).

### 373 **Conservation in age-related transcriptional changes between oenocytes and liver**

374 Since our analyses suggest that *Drosophila* oenocytes may perform liver-like functions,  
375 we wonder if oenocyte and liver exhibit similar transcriptional changes during aging. To test this,  
376 we compared age-related transcriptomic profiles between *Drosophila* oenocytes and mouse liver  
377 [10]. We first searched for fly orthologues of mouse liver genes using *Drosophila* Integrative  
378 Ortholog Prediction Tool (DIOPT) [43]. Out of 1052 protein-coding genes that are differentially  
379 expressed in aging mouse liver, 735 of them have putative orthologues in *Drosophila* genome,  
380 corresponding to 881 *Drosophila* genes (Fig. 7A). About 30% of these *Drosophila* orthologues  
381 (252 out of 881) also showed differential expression during oenocyte aging, suggesting a large  
382 conservation between liver and oenocyte aging (Table S1: List 17-18).

383 Gene ontology analysis showed that several key biological processes were altered in aged  
384 liver, including immune response, apoptosis, peroxisome, bile acid biosynthesis, and fatty acid  
385 metabolism (Table S2: List 17-18). Among these biological processes, peroxisome and fatty acid  
386 metabolism are shared between liver and oenocyte aging (Fig. 7A). Next, we took a close look at  
387 the pathways that contain same orthologues between fly and mouse. Genes up-regulated in both  
388 aged oenocytes and liver were enriched in pathways like Mitogen-activated protein kinase  
389 (MAPK), Ras signaling, NF- $\kappa$ B, and JAK-STAT (Fig. 7B), while down-regulated genes were  
390 found in peroxisome, fatty acid metabolism, and oxidative phosphorylation pathways (Fig. 7C)  
391 (Table S2: List 17-18). Using STRING protein network analysis, we found that large number of  
392 Ras/MAPK signaling components were up-regulated under both oenocyte and liver aging (Figs.  
393 7D&7E), suggesting that age-dependent dysregulation of these pathways are conserved between  
394 fly and mammal.

395 Lastly, we examined age-related transcriptomic changes between oenocytes and several  
396 other fly tissues, such as fat body, midgut, and heart. The age-related transcriptional profiles in  
397 these fly tissues were obtained from recent genomic studies [44-46] (Table S1: List 19-20).  
398 Pathway analysis (using STRING) on these tissue transcriptomes revealed a tissue-specific  
399 transcriptional profiles during fly aging (Fig. 7F). Each tissue has its own and unique age-  
400 regulated biological processes and pathways (Fig. 7G) (Table S2: List 20-21). For example,  
401 genes that were differentially expressed in aged oenocytes are enriched for proteasome and

402 ribosome-related functions, while aged fat body showed transcriptional changes in aminoglycan  
403 metabolism, chitin metabolism, and detoxification. In aging heart, immune response, glycolysis  
404 and gluconeogenesis were enriched. And ion transport, DNA replication, and fatty acid  
405 degradation were altered in aging midgut (Fig. 7G). Taken together, aged oenocytes share similar  
406 transcriptional profiles with aging liver, while they also exhibit unique features compared to  
407 other fly tissues.

408

## 409 **Discussion**

410 Oenocytes are one of the poorly studied yet important cells in insects [21, 22]. Although  
411 previous studies show that oenocytes play a crucial role in lipid metabolism (e.g., synthesis of  
412 cuticular hydrocarbon and pheromone), many other oenocyte-regulated physiological functions  
413 remain to be determined. Among the uncharacterized functions, we know very little about  
414 oenocyte aging and the role of oenocytes in aging regulation. To address these issues, we  
415 performed RiboTag sequencing to characterize *Drosophila* oenocyte transcriptome under aging  
416 and oxidative stress. We show that both aging and paraquat up-regulated DNA repair pathway,  
417 while down-regulating immune response and fatty acid elongation. In addition, aged oenocytes  
418 were associated with impaired peroxisome, mitochondrial, proteasome, and cytochrome P450  
419 pathways. Our RiboTag sequencing also revealed many shared tissue-specific pathways and age-  
420 related transcriptional changes between fly oenocytes and mammalian liver, highlighting  
421 evolutionarily conserved mechanisms underlying oenocyte and liver aging and potential  
422 functional homologies between the two tissues.

423

### 424 **1. Oenocyte-specific expressed genes are involved in insect-specific and conserved liver-like** 425 **functions.**

426 Previous functional and histological analyses showed that oenocytes contain large  
427 amounts of smooth ER and acidophilic cytoplasm (high protein and lipid contents) [47, 48],  
428 which is consistent with their roles in lipid synthesis and processing, especially the production of  
429 VLCFA and hydrocarbon [20, 24, 49, 50]. Interestingly, *Drosophila* oenocytes uptake and  
430 process fatty acids that are released from the storage tissue fat body during food deprivation [14].  
431 The coordination between fat body and oenocytes in mobilizing lipid storage during fasting is  
432 quite similar to the adipose-liver axis in mammals. Besides lipid metabolism, many other

433 oenocyte-associated functions (e.g., detoxification and ecdysteroid biosynthesis) have not yet  
434 been thoroughly examined at the molecular level. It is unclear whether some of these functions  
435 are also conserved liver-like functions, or they are merely insect-specific roles.

436 To better understand oenocyte function, we conducted oenocyte-specific transcriptome  
437 profiling in adult *Drosophila* and identified 423 genes that were highly expressed in oenocytes  
438 (at least 5-fold higher than whole body expression). These genes were enriched in pathways like  
439 fatty acid elongation, proteasome-mediated protein catabolism, xenobiotic metabolism,  
440 ketogenesis, and peroxisome pathways. There was only a small overlap between oenocyte-  
441 enriched and fat body-enriched genes, suggesting that the two tissues regulate distinct functions  
442 in *Drosophila*. Comparing to the genes and pathways enriched in human liver, we found that  
443 oenocytes shared several biological processes with liver, such as ketogenesis, peroxisomal beta-  
444 oxidation, ROS metabolism, long-chain fatty acid metabolism, and xenobiotic metabolism. This  
445 is consistent with a previous study showing that *Drosophila* oenocytes expressed high levels of  
446 lipid metabolic genes similar to those of mammalian liver [14]. One enriched pathway in  
447 *Drosophila* oenocytes that was not observed in the previous study is the ketogenesis pathway. It  
448 is well-known that ketone bodies (acetoacetate,  $\beta$ -hydroxybutyrate, and acetone) are primarily  
449 produced by liver when glucose is not available as fuel source [51]. Ketogenesis in insects,  
450 however, is not well studied. Ketone bodies have been detected in hemolymph, fat body, and  
451 thoracic muscle of adult desert locust and cockroach [52-54]. It is speculated that ketone bodies  
452 are produced in fat body according to the *ex vivo* tissue culture assay in locust [53]. However, fat  
453 body (along with many other tissues) can also oxidize ketone bodies, which is quite different  
454 from mammals where the ketogenesis tissue liver cannot oxidize ketone [53]. It might be  
455 possible that in previous *ex vivo* tissue culture studies, the ketone production came from a  
456 contaminated tissue (like oenocytes), rather than fat body. Based on our oenocyte transcriptome  
457 analysis, most of the ketogenesis genes are highly expressed in oenocytes, but not in fat body.  
458 Our data suggest that oenocytes are likely the major ketogenesis tissue. A careful function and  
459 genetic analysis, such as cell ablation or tissue-specific gene silencing, will need to be performed  
460 to examine whether oenocytes are responsible for ketogenesis in *Drosophila* and in other insect  
461 species.

462 Insect hydrocarbons serve as important waterproofing components, and species- and sex-  
463 specific recognition signals. The biosynthesis of hydrocarbons are involved in fatty acid

464 elongation, desaturation, reduction, and oxidative decarbonylation [55]. Our oenocyte  
465 translome analysis revealed an enrichment of genes in microsomal fatty acid elongation  
466 system, such as *CG18609*, *spidey*, *CG6746*, and *Sc2*. This is consistent with oenocyte's role in  
467 hydrocarbon production and its abundant smooth ER content. In microsomal fatty acid  
468 elongation system, *spidey* (also known as *Kar*) encodes for the only very-long-chain 3-ketoacyl-  
469 CoA reductase in *Drosophila* genome, and it has been implicated in oenocyte VLCFA synthesis  
470 and waterproof of the trachea system [50], as well as the production of cuticular hydrocarbon,  
471 ecdysteroid metabolism, and oenocyte maturation [24, 56]. Final two steps of hydrocarbon  
472 production in insects are very-long-chain fatty acyl-CoA to aldehydes conversion by FAR and  
473 aldehyde oxidative decarbonylation by *Cyp4g1* and *Cpr* [21, 37]. Our translome analysis  
474 showed that five different FARs (including *FarO*), *Cyp4g1*, and *Cpr* are highly expressed in  
475 adult oenocytes. The large number of FARs expressed in adult oenocytes suggests that aldehyde-  
476 forming FARs may be responsible for the production of a variety of hydrocarbons in oenocytes,  
477 and each FAR can catalyze a unique set of very-long-chain fatty acyl-CoA esters that vary in  
478 saturation status and chain length.

479 In adult insects (especially in females), ovary is the major tissue for ecdysteroid  
480 biosynthesis [57, 58]. It remains to be determined whether other adult tissues are also capable to  
481 synthesize ecdysteroids. Interestingly, we found two Halloween genes (*phantom* and *shadow*)  
482 that are highly expressed in adult oenocytes, suggesting that oenocytes may participate in  
483 ecdysteroid synthesis in adult females. Our findings are consistent with an early study showing  
484 that abdominal oenocytes dissected from *Tenebrio molitor* larvae can synthesize 20-  
485 Hydroxyecdysone ( $\beta$ -ecdysone) [59]. Several recent studies also detected the expression of  
486 Halloween genes in adult tissues other than ovaries, such as brain [60], fat body, muscle, and  
487 Malpighian tubule [61]. To functionally verify the role of adult oenocytes in ecdysteroid  
488 biosynthesis, direct measurement of ecdysteroid production is needed when Halloween genes are  
489 specifically knocked down in oenocytes.

490

## 491 **2. Impaired peroxisome pathway and fatty acid beta-oxidation are the hallmarks of** 492 **oenocyte aging.**

493 Our translome analysis identified large number of genes (1092 up-regulated and 2232  
494 down-regulated) that were differentially expressed between young and middle ages, suggesting



495 that dramatic cellular and molecular alterations can be observed in oenocytes at the middle age.  
496 Some of these changes are consistent with previous aging transcriptome analysis in *Drosophila*  
497 [30, 31, 62], such as up-regulation of DNA repair and down-regulation of oxidative  
498 phosphorylation. On the other hand, oenocyte aging was specifically associated with the  
499 dysregulation of several other pathways, such as down-regulation of peroxisome and fatty acid  
500 metabolism pathways. Peroxisomes are important subcellular organelles that participate in a  
501 variety of metabolic pathways, including alpha-oxidation of phytanic acids, beta-oxidation of  
502 VLCFA, ether phospholipid synthesis (e.g., plasmalogen biosynthesis), ROS and hydrogen  
503 peroxide metabolism, glyoxylate metabolism, catabolism of amino acids and purine [63]. There  
504 are about 16 peroxisome biogenesis genes (also known as peroxin, or PEX) in *Drosophila* that  
505 are responsible for peroxisome membrane assembly (Pex3, Pex6, Pex9), matrix enzyme import  
506 and receptor recycling (Pex5, Pex7, Pex13, Pex14, Pex2, Pex10, Pex12, Pex1, Pex6), and  
507 peroxisome proliferation (Pex11) [64]. Mutation in many peroxin genes leads to various forms of  
508 peroxisome biogenesis disorder (PBD), also known as Zellweger syndrome (ZS) in human [63].  
509 Our data revealed that aging and oxidative stress decreased the expression of most of the  
510 peroxisome biogenesis and protein import genes, which may lead to reduced peroxisome  
511 function, including hydrogen peroxide metabolism. Decreased expression of receptor protein  
512 Pex5 and reduced peroxisomal enzyme import were previously observed in aged *C. elegans* [38]  
513 and during human fibroblast senescence [65]. Among many key peroxisomal enzymes, the  
514 importing of antioxidant catalase was significantly affected during fibroblast senescence, which  
515 led to accumulation of hydrogen peroxide and further disruption of peroxisome import [65].  
516 Similar to early studies in aging rat liver [66-68], we found that the expression of many  
517 peroxisomal antioxidant enzymes (e.g., *Cat*, *SOD1*, *Prx5*) decreased in aged oenocytes. The  
518 combined dysregulation of peroxisomal gene expression and protein import may attribute to  
519 elevated toxic reactive oxygen species, and impaired oenocyte functions. Furthermore,  
520 generation of excess peroxisomal ROS could disrupt mitochondria redox balance, leading to  
521 mitochondrial dysfunction and tissue aging [69].

522 Impaired peroxisome biogenesis/protein import during aging not only contributes to  
523 reduced antioxidant capacity and elevated ROS levels, but also dysregulation of other  
524 peroxisomal functions. Besides ROS metabolism, our transcriptome analysis revealed that genes  
525 involved in peroxisomal beta-oxidation and ether phospholipid were down-regulated under

526 oenocyte aging. This is consistent with previous studies showing that peroxisomal beta-oxidation  
527 activity decreased in old mouse liver [70]. Peroxisome has been shown to coordinate with  
528 mitochondrial fission/fusion pathway to regulate cellular fatty acid oxidation [71], a major  
529 metabolic process dysregulated during mouse aging [72]. Although the metabolic reactions for  
530 fatty acid beta-oxidation are similar in mitochondria and peroxisome, a set of fatty acid  
531 substrates can only be processed by peroxisomes, such as VLCFA, pristanic acid, di- and  
532 trihydroxycholestanic acid (DHCA and THCA), long-chain dicarboxylic acids, certain  
533 polyunsaturated fatty acids [63, 73]. Mutation of peroxisome fatty acid transporter ABCD1  
534 impaired peroxisomal beta-oxidation and caused to accumulation of VLCFAs and  
535 neuroinflammation, which is associated X-link neurodegenerative disease adrenoleukodystrophy  
536 [74, 75]. Mouse homozygous mutants of ACOX, which catalyzes the first step of peroxisomal  
537 beta-oxidation, also showed accumulation of VLCFA and development of microvesicular fatty  
538 liver. Although the expression of two *Drosophila* ACOX genes were not significantly altered  
539 during oenocyte aging, ScpX (peroxisomal thiolase) was significantly down-regulated. Mice  
540 with ScpX mutation showed defects in peroxisome proliferation, hypolipidemia, motor and  
541 peripheral neuropathy, as well as impaired catabolism of methyl-branched fatty acids [76]. In  
542 addition, reduced peroxisome function can disrupt lipid homeostasis and lipid composition,  
543 which could lead to compromised immune response [77, 78].

544

### 545 **3. Conservation between oenocytes and liver aging.**

546 The comparison of aging transcriptomes between fly oenocytes and mouse liver revealed  
547 many shared pathways between the two tissues. Among these conserved pathways, MAPK and  
548 Ras signaling pathways were significantly up-regulated in both aged oenocytes and liver. MAPK  
549 signaling is one of the major regulatory pathways involved in stress responses (e.g., oxidative  
550 stress). The typical MAPK pathway includes three branches: c-Jun N-terminal kinase (JNK),  
551 p38/MAPK, and extracellular signal-regulated kinase (ERK). Previous studies show that all three  
552 MAPK cascades are elevated under aging, probably due to increased oxidative stress [79, 80].  
553 Dysregulated MAPK signaling has been implicated in cancer and neurodegenerative diseases  
554 such as Alzheimer's disease, Parkinson's disease, and amyotrophic lateral sclerosis (reviewed in  
555 [81]). In model organisms (e.g., *Drosophila* and *C. elegans*), activation of JNK and p38/MAPK  
556 extended lifespan and improved tissue functions in late life [82-84]. Among many MAPK

557 components identified in our analysis, the activator protein 1 (AP-1) subunit, *Drosophila* Kay  
558 and its mouse orthologue c-Fos, were found significantly induced under aging. Both Kay and c-  
559 Fos are basic leucine zipper transcription factors that mediate JNK signaling to regulate cell  
560 proliferation, tissue regeneration, stress tolerance [85, 86]. Since JNK signaling is the key  
561 regulator for the maintenance of tissue homeostasis in response to intrinsic and extrinsic stresses  
562 (e.g., UV irradiation, ROS, DNA damage, inflammatory cytokines, infection), the induction of  
563 Kay/c-Fos indicates an up-regulation of JNK signaling and accumulated cellular damages/stress  
564 responses in aged oenocytes and liver. In addition, Ras small GTPase pathway, the upstream  
565 regulator of MAPK kinase cascades, was also up-regulated during oenocyte and liver aging. The  
566 direct role of Ras signaling pathway in longevity regulation has been previously demonstrated in  
567 several model organisms [87-90]. Further studies on Ras/MAPK signaling are needed to advance  
568 our understanding on the specific contributions of these pathways in oenocyte and liver aging.  
569 Nevertheless, the up-regulation of Ras/MAPK signaling pathways can be used as an important  
570 molecular signature and biomarker for oenocyte and liver aging.

571

## 572 **Conclusion**

573 Using RiboTag sequencing, we characterized the first oenocyte transcriptome profiles in  
574 *Drosophila*. Our analysis uncovered many previously unexplored oenocyte-specific molecular  
575 pathways, especially those associated with oxidative stress and aging. Some of these pathways  
576 were found enriched in both fly oenocytes and mammalian liver, suggesting a functional  
577 homolog between the two tissues. We believe that the analysis of oenocyte transcriptome will  
578 contribute significantly to our understanding of oenocyte biology, as well as the molecular  
579 mechanisms for its role in stress response and aging regulation.

580

## 581 **Methods**

### 582 **Fly strains, aging and paraquat treatment**

583 Flies are raised in 12h:12 h light:dark cycle at 25 °C, 60% relative humidity on agar-  
584 based diet with 0.8% cornmeal, 10% sugar, and 2.5% yeast (unless otherwise noted). Fly strains  
585 used in the present study include: *w\**; *PromE-Gal4* (also known as *Desat1-GAL4.E800*)  
586 (Bloomington #65405) [20], *PromE-Gal4; UAS-CD8::GFP* (a gift from Alex Gould), *UAS-*  
587 *RpL13A-FLAG* (a gift from Pankaj Kapahi), To age flies, females were collected two days after

588 eclosion, and twenty females per vial were maintained at 25 °C and transferred to fresh food  
589 every 2-3 days. Two ages were tested, young (10-day-old) and middle age (30-day-old). For  
590 paraquat treatment, flies were fed on fly food containing 10 mM of paraquat (at the food surface)  
591 for 24 hours prior to each assay.

#### 592 **Dihydroethidium (DHE) staining**

593 Young and aged flies were fed on normal food or paraquat (10 mM) for 24 hours prior to  
594 the staining with dihydroethidium (Calbiochem, Burlington, MA, USA. Catalog number: 38483-  
595 26-0). DHE staining was performed as previously described [91]. Briefly, fly abdomen was  
596 dissected out (fat body removed) and incubated with 30 µM of DHE in Schneider's *Drosophila*  
597 Medium (ThermoFisher Scientific, Catalog number: 21720-024) for 5 minutes in a dark chamber  
598 on an orbital shaker. After additional 5 minutes incubation with 1 µg/mL of Hoechst 33342  
599 (ImmunoChemistry Technologies, Bloomington, MN, USA. Catalog number: 639), fly abdomen  
600 was mounted with 50% glycerol in PBS. DHE staining was visualized with Olympus BX51WI  
601 upright epifluorescence microscopy.

#### 602 **Oenocyte RiboTag**

603 Female progeny from the crosses between *PromE-gal4* and *UAS-RpL13A-FLAG* were  
604 collected two days after eclosion. Four different experimental groups were tested: 1). 10-day-old  
605 females fed on normal food (H<sub>2</sub>O-Young); 2). 10-day-old females treated with 10 mM of  
606 paraquat for 24 hours (PQ-Young); 3). 30-day-old females fed on normal food (H<sub>2</sub>O-Aged); 4).  
607 30-day-old females treated with 10 mM of paraquat for 24 hours (PQ-Aged). Three biological  
608 replicates (200 females per replicate) were performed for each group. Female flies were used in  
609 the present study, because *PromE-gal4* drives expression in testis (additional to oenocytes) in  
610 male flies [20].

611 RiboTag was performed following the protocol from McKnight Lab [28]. Briefly, flies  
612 were first frozen and ground in nitrogen liquid. The fly powder was then further homogenized in  
613 a Dounce tissue grinder containing 5 mL of homogenization buffer (50 mM Tris-HCl, pH 7.4,  
614 100 mM KCl, 12 mM MgCl<sub>2</sub>, 1 mM DTT, 1% NP-40, 400 units/ml RNasin RNase inhibitor,  
615 100 µg/ml of cycloheximide, 1 mg/ml heparin, and Protease inhibitors). After centrifuging the  
616 homogenate at 10,000 rpm for 10 minutes, the supernatant was first pre-cleaned using  
617 SureBeads™ Protein G Magnetic Beads (Bio Rad, Hercules, CA, USA. Catalog number: 161-  
618 4023), and then incubated with 15 µl of anti-FLAG antibody (Sigma-Aldrich, St. Louis, MO,

619 USA. Catalog number: F1804) for about 19 hours at 4 °C. The antibody/lysate mixture was then  
620 incubated with 100 µl of SureBeads for 3 hours at 4 °C. Ribosome-bound RNA was extracted  
621 and purified using RNeasy Plus Micro Kit (Qiagen, Hilden, Germany. Catalog number: 74034).

### 622 **Transcriptome library construction and high-throughput sequencing (RNA-Seq)**

623 RNA-Seq libraries were constructed using 300 ng of total RNA and NEBNext Ultra  
624 Directional RNA Library Prep Kit for Illumina (New England Biolabs (NEB), Ipswich, MA,  
625 USA. Catalog number: E7420). Poly(A) mRNA was isolated using NEBNext Oligo d(T)<sub>25</sub> beads  
626 and fragmented into 200 nt in size. After first strand and second strand cDNA synthesis, each  
627 cDNA library was ligated with a NEBNext adaptor and barcoded with an adaptor-specific index.  
628 Twelve libraries were pooled in equal concentrations, and sequenced using Illumina HiSeq 3000  
629 platform (single-end, 50 bp reads format).

### 630 **RNA-Seq data processing and differential expression analysis**

631 The RNA-Seq data processing was performed on Galaxy, an open source, web-based  
632 bioinformatics platform (<https://usegalaxy.org>) [92]. FastQC was first performed to check the  
633 sequencing read quality. Then the raw reads were mapped to *D. melanogaster* genome (BDGP  
634 Release 6 + ISO1 MT/dm6) using Tophat2 v2.1.0 [93]. Transcripts were reconstructed using  
635 Cufflinks v2.2.1 with bias correction. Cuffmerge (<http://cole-trapnell-lab.github.io/cufflinks/>)  
636 was used to merge together 12 Cufflinks assemblies to produce a GTF file for further differential  
637 expression analysis with Cuffdiff v2.2.1.3 [94]. After normalization, differentially expressed  
638 protein-coding transcripts were obtained using following cut-off values, false discovery rate  
639 (FDR) ≤ 0.05 and fold-change ≥ 2. RNA-Seq read files have been deposited to NCBI's Gene  
640 Expression Omnibus (GEO) (Accession # is GSE112146). Non-coding gene and low expressed  
641 genes (FPKM < 0.01) were excluded from the analysis.

### 642 **Principal component analysis (PCA), heatmap and expression correlation plot**

643 PCA graph was generated using plotPCA function of R package DESeq2 [95]. Heatmaps  
644 and hierarchy clustering analysis were generated using heatmap.2 function of R package gplots.  
645 (<https://cran.r-project.org/web/packages/gplots>). Expression data was log<sub>2</sub> transformed and all  
646 reads were added by a pseudo-value 1. The expression correlation plots were plotted using R  
647 package ggplot2 (<https://cran.r-project.org/web/packages/ggplot2>).

### 648 **Oenocyte-enriched genes and tissue-specific aging transcriptome analysis**

649 Oenocyte-enriched genes were identified by comparing our oenocyte RiboTag data (H2O  
650 Young group) to the whole body transcriptome profiles from previous studies (two wild-type  
651 backgrounds: *w<sup>1118</sup>*: GSM2647344, GSM2647345, GSM2647345. *yw*: GSM694258,  
652 GSM694259). The sequencing reads with FPKM  $\geq 0.01$  were normalized by quantile  
653 normalization function using preprocessCore package.  
654 (<https://www.bioconductor.org/packages/release/bioc/html/preprocessCore.html>). Oenocyte-  
655 enriched genes were defined as those with 5-fold higher FPKM in oenocytes comparing to whole  
656 body. Fat body-enriched genes were obtained similarly by comparing the expression values  
657 between adult fat body and whole body (data retrieved from FlyAtlas).

658 The lists of differentially expressed genes in multiple fly tissues were extracted from  
659 previous transcriptome analyses, heart [44], posterior midgut [46], fat body [45]. Venn diagram  
660 analysis (<http://bioinformatics.psb.ugent.be/webtools/Venn/>) was performed to identify  
661 overlapping genes between different tissues.

#### 662 **Gene Set Enrichment Analysis (GSEA)**

663 For GSEA analysis, a complete set of 136 KEGG pathways in *Drosophila* were  
664 downloaded from KEGG. Text were trimmed and organized using Java script. Quantile  
665 normalized FPKM values for each group were used as input for parametric analysis, and  
666 organized as suggested by GSEA tutorial site (GSEA,  
667 <http://software.broadinstitute.org/gsea/doc/GSEAUUserGuideFrame.html>) [96]. Collapse dataset  
668 to gene symbols was set to false. Permutation type was set to gene set; enrichment statistic used  
669 as weighted analysis; metric for ranking genes was set to Signal to Noise.

#### 670 **Gene ontology and pathway analysis**

671 Functional annotation analysis of differentially expressed genes was performed using  
672 STRING. GO terms (Biological Process, Molecular Function, Cellular Component), KEGG  
673 pathway, INTERPRO Protein Domains and Features, were retrieved from the analysis. To build  
674 Ras/MAPK protein network in STRING, “kmeans clustering” option was used and number of  
675 clusters was set to 2 or 3.

#### 676 **Quantitative real-time polymerase chain reaction (qRT-PCR)**

677 qRT-PCR was performed using Quantstudio 3 Real-Time PCR system and SYBR green  
678 master mixture (Thermo Fisher Scientific, Waltham, MA, USA Catalog number: A25778). To  
679 determine the most stable housekeeping gene, the Ct values for four housekeeping genes were

680 examined in all twelve cDNA samples obtained from different treatments. Using an Excel-based  
681 tool, *Bestkeeper* [97], we confirmed that *Gapdh1* is the least-variable housekeeping gene across  
682 samples (Table S3). All gene expression levels were normalized to *Gapdh1* by the method of  
683 comparative Ct [98]. Mean and standard errors for each gene were obtained from the averages of  
684 three biological replicates, with one or two technical repeats. Primer sequences are available in  
685 Table S4.

686

### 687 **Statistical analysis**

688 GraphPad Prism (GraphPad Software, La Jolla, CA, USA) was used for statistical analysis. To  
689 compare the mean value of treatment groups versus that of control, either student t-test or one-  
690 way ANOVA was performed using Dunnett's test for multiple comparison.

691

692

693

694

### 695 **Acknowledgements**

696 We thank Bloomington *Drosophila* Stock Center, Pankaj Kapahi, Alex Gould, Joel Levine for  
697 fly stocks, reagents and protocols. Michael Baker and DNA Facility at ISU for help with RNA-  
698 Seq analysis. This work was supported by NIH/NIA R00 AG048016 to HB, AFAR Research  
699 Grants for Junior Faculty to HB, and Glenn/AFAR Scholarships for Research in the Biology of  
700 Aging to KH.

701

### 702 **Author Contributions Statement**

703 Conceived and designed the experiments: KH HB. Performed the experiments: KH WC HB.  
704 Analyzed the data: KH WC FZ HB. Wrote the paper: KC FZ HB. All authors reviewed and  
705 approved the manuscript.

706

### 707 **Competing Interests**

708 The authors declare that no competing interest exists.

709

710

711 **Figure Legends**

712 **Figure 1. Characterization of age-related changes in ROS production in *Drosophila***

713 **oenocytes.** (A) Fluorescent image of GFP-labeled oenocytes from the abdomen of *PromE-Gal4*;  
714 *UAS-CD8::GFP* female flies. Scale bar: 100  $\mu$ m. (B) ROS levels indicated by DHE staining in  
715 female oenocytes under aging and paraquat (PQ) treatment. Young: 10-day-old, Aged  
716 : 30-day-old. DAPI stains for nuclei. Scale bar: 10  $\mu$ m. (C) Quantification of DHE staining from  
717 Panel (B). One-way ANOVA (\*\*\*)  $p < 0.001$ , \*  $p < 0.05$ ). N=5.

718  
719 **Figure 2. Oenocyte-specific translomic profiling through RiboTag sequencing.** (A)  
720 Schematic diagram showing RiboTag procedures. FLAG-tagged ribosomal protein RpL13A was  
721 first ectopically expressed in oenocytes. Translating RNAs were immunoprecipitated using anti-  
722 FLAG antibodies. RNAs were further purified and used in RNA-seq analysis. (B) Oenocyte-  
723 specific transcript *desat1-E* highly expressed in anti-FLAG immunoprecipitated sample (IP)  
724 compared to the input (whole body lysate). (C) The transcripts of brain-specific gene *Dilp2* was  
725 enriched in head samples compared to oenocyte RiboTag samples. One-way ANOVA (\*\*\*\*  
726  $p < 0.0001$ , \*\*\*  $p < 0.001$ , \*\*  $p < 0.01$ , \*  $p < 0.05$ , ns = not significant). N=3. (D) RNA  
727 concentrations of various immunoprecipitated samples. ND: Not detected. 200 female flies were  
728 used in each condition. Three biological replicates per condition.

729  
730 **Figure 3. Differential gene expression analysis reveals common and distinct transcriptional**

731 **regulation by aging and oxidative stress.** (A) Principal component analysis (PCA) on four  
732 oenocyte translomes. (B-D) Correlation analysis on the gene expression between H2O-Young  
733 and H2O-Aged; H2O-Young and PQ-Young; H2O-Aged and PQ-Aged.  $\log_{10}$  (FPKM) was used  
734 in the analysis (E-F) Venn diagram and GO terms for the genes commonly and differentially  
735 regulated by aging and paraquat. (G-H) Venn diagram and GO terms for the genes commonly  
736 and differentially regulated by paraquat at two ages. (I) Hierarchy clustering analysis on  
737 oenocyte translome. (J-K) Gene ontology analysis on cluster 3 and 5 in panel (I).

738  
739 **Figure 4. GSEA analysis revealed up- and down-regulated pathways under aging.** (A) List  
740 of the pathways up-regulated in aged oenocytes. (B) List of the pathways down-regulated in aged  
741 oenocytes. ES: Enrichment score. (C-H) GSEA enrichment profiles of six pathways: DNA



742 replication, oxidative phosphorylation, proteasome, peroxisome, glutathione S-transferase,  
743 cytochrome P450. (I-K) Heatmaps for mitochondrial ribosomal subunits, glutathione S-  
744 transferase, cytochrome P450.

745  
746 **Figure 5. Peroxisome pathway is transcriptionally deregulated in aged oenocytes.** (A)  
747 Schematic diagram showing peroxisome pathway and the role of each peroxin (PEX) genes. (B-  
748 C) Log<sub>2</sub> (fold change) of the expression of PEX genes under aging and paraquat treatment, based  
749 on oenocyte RiboTag sequencing results. (D-E) Log<sub>2</sub> (fold change) of the expression of genes  
750 involved in other peroxisome functions during oenocyte aging. (F-H) qRT-PCR verification of  
751 three peroxisome genes (*Pex5*, *Pex19*, *Cat*). One-way ANOVA (, \*\* p<0.01, ns = not  
752 significant). N=3.

753  
754 **Figure 6. Ketogenesis and fatty acid elongation are enriched in both oenocytes and liver.**  
755 (A) List of ketogenesis genes that are enriched in both oenocytes and liver. (B) Schematic  
756 diagram showing ketogenesis pathway. (C) List of genes in microsomal fatty acid elongation  
757 pathway that are enriched in both oenocytes and liver. (D) Schematic diagram showing  
758 microsomal fatty acid elongation pathway (in smooth ER). Oenocyte-enriched genes are  
759 highlighted in red. Liver-enriched genes are highlighted in blue.

760  
761 **Figure 7. Conservation of age-related transcriptional changes between oenocytes and liver.**  
762 (A) Venn diagram comparing genes differentially expressed in aged liver and aged oenocytes.  
763 The mouse liver genes were first converted to their putative *Drosophila* orthologues before  
764 comparing to oenocyte aging genes. GO terms were shown in the lower panel. (B) Signaling  
765 pathways that were up-regulated under both oenocyte and liver aging. (C) Signaling pathways  
766 that were down-regulated under both oenocyte and liver aging. The genes listed in Panel B&C  
767 are the orthologues between *Drosophila* and mouse. (D-E) List of all genes in Ras/MAPK  
768 signaling pathway that were down-regulated in aged fly oenocytes and mouse liver. Protein  
769 network was generated using STRING (with *kmeans clustering* option). (F) Venn diagram  
770 showing the overlap of differentially expressed genes in aged oenocytes, fat body, heart, and  
771 midgut. (G) GO terms enriched in aged oenocytes, fat body, heart, and midgut.

772

773 **Table 1. Comparison of the GO terms enriched in oenocyte, fat body and liver**

774

775 **Table S1. Gene list tables**

776 **Table S2. GO term tables**

777 **Table S3. Housekeeping gene analysis using *Bestkeeper***

778 **Table S4. Primer list**

779

780 **Figure S1. Age-dependent *PromE-gal4* expression pattern.** (A-B) Fluorescent image *PromE-*  
781 *Gal4; UAS-CD8::GFP* female flies at two ages: Young (10-day-old), Aged  
782 (30-day-old). Scale bar: 50  $\mu$ m. (C) Quantification of GFP intensity from Panel (A&B). Student  
783 t-test (ns = not significant). N=9.

784 **Figure S2. Two ecdysteroid biosynthesis genes highly express in oenocytes.** Schematic  
785 diagram showing ecdysteroid hormone metabolism pathway. Two Halloween genes, *phantom*  
786 *and shadow*, highly expressed in adult female oenocytes (Highlighted in red).

787 **Figure S3. Genes in innate immunity pathway highly express in oenocytes.** (A) Genes  
788 enriched in oenocytes and fat body show less overlap. (B) Genes in Imd pathway were enriched  
789 in oenocytes, while fat body were enriched with genes in Toll pathway (Red arrows denote for  
790 age-induced genes. Blue arrows denote for age-repressed gene.).

791 **Figure S4. Peroxisome pathways are enriched in both oenocytes and liver.** List of  
792 peroxisome genes that are enriched in both oenocytes and liver.

793

794

795

796

797

798

799

800

801

802

803

804 **References**

- 805 1. Kennedy BK, Berger SL, Brunet A, Campisi J, Cuervo AM, Epel ES, Franceschi C,  
806 Lithgow GJ, Morimoto RI, Pessin JE *et al*: **Geroscience: linking aging to chronic**  
807 **disease**. *Cell* 2014, **159**(4):709-713.
- 808 2. Koehler EM, Schouten JN, Hansen BE, van Rooij FJ, Hofman A, Stricker BH, Janssen  
809 HL: **Prevalence and risk factors of non-alcoholic fatty liver disease in the elderly:**  
810 **results from the Rotterdam study**. *Journal of hepatology* 2012, **57**(6):1305-1311.
- 811 3. Kim IH, Kisseleva T, Brenner DA: **Aging and liver disease**. *Current opinion in*  
812 *gastroenterology* 2015, **31**(3):184-191.
- 813 4. Sheedfar F, Di Biase S, Koonen D, Vinciguerra M: **Liver diseases and aging: friends or**  
814 **foes?** *Aging Cell* 2013, **12**(6):950-954.
- 815 5. Schmucker DL: **Age-related changes in liver structure and function: Implications for**  
816 **disease ?** *Experimental gerontology* 2005, **40**(8-9):650-659.
- 817 6. Jin J, Iakova P, Breaux M, Sullivan E, Jawanmardi N, Chen D, Jiang Y, Medrano EM,  
818 Timchenko NA: **Increased expression of enzymes of triglyceride synthesis is essential**  
819 **for the development of hepatic steatosis**. *Cell Rep* 2013, **3**(3):831-843.
- 820 7. Amir M, Czaja MJ: **Autophagy in nonalcoholic steatohepatitis**. *Expert review of*  
821 *gastroenterology & hepatology* 2011, **5**(2):159-166.
- 822 8. Zhang C, Cuervo AM: **Restoration of chaperone-mediated autophagy in aging liver**  
823 **improves cellular maintenance and hepatic function**. *Nature medicine* 2008,  
824 **14**(9):959-965.
- 825 9. Franceschi C, Bonafe M, Valensin S, Olivieri F, De Luca M, Ottaviani E, De Benedictis  
826 G: **Inflamm-aging. An evolutionary perspective on immunosenescence**. *Annals of the*  
827 *New York Academy of Sciences* 2000, **908**:244-254.
- 828 10. White RR, Milholland B, MacRae SL, Lin M, Zheng D, Vijg J: **Comprehensive**  
829 **transcriptional landscape of aging mouse liver**. *BMC genomics* 2015, **16**:899.
- 830 11. Tollet-Egnell P, Flores-Morales A, Stahlberg N, Malek RL, Lee N, Norstedt G: **Gene**  
831 **expression profile of the aging process in rat liver: normalizing effects of growth**  
832 **hormone replacement**. *Molecular endocrinology* 2001, **15**(2):308-318.
- 833 12. Horvath S, Erhart W, Brosch M, Ammerpohl O, von Schonfels W, Ahrens M, Heits N,  
834 Bell JT, Tsai PC, Spector TD *et al*: **Obesity accelerates epigenetic aging of human**  
835 **liver**. *Proc Natl Acad Sci U S A* 2014, **111**(43):15538-15543.
- 836 13. He Y, Jasper H: **Studying aging in Drosophila**. *Methods* 2014, **68**(1):129-133.
- 837 14. Gutierrez E, Wiggins D, Fielding B, Gould AP: **Specialized hepatocyte-like cells**  
838 **regulate Drosophila lipid metabolism**. *Nature* 2007, **445**(7125):275-280.
- 839 15. Arrese EL, Soulages JL: **Insect fat body: energy, metabolism, and regulation**. *Annual*  
840 *review of entomology* 2010, **55**:207-225.
- 841 16. Partridge L, Alic N, Bjedov I, Piper MD: **Ageing in Drosophila: the role of the**  
842 **insulin/Igf and TOR signalling network**. *Experimental gerontology* 2011, **46**(5):376-  
843 381.
- 844 17. Bai H, Kang P, Tatar M: **Drosophila insulin-like peptide-6 (dilp6) expression from fat**  
845 **body extends lifespan and represses secretion of Drosophila insulin-like peptide-2**  
846 **from the brain**. *Aging Cell* 2012, **11**(6):978-985.
- 847 18. Hwangbo DS, Gershman B, Tu MP, Palmer M, Tatar M: **Drosophila dFOXO controls**  
848 **lifespan and regulates insulin signalling in brain and fat body**. *Nature* 2004,  
849 **429**(6991):562-566.

- 850 19. Giannakou ME, Goss M, Junger MA, Hafen E, Leevers SJ, Partridge L: **Long-lived**  
851 **Drosophila with overexpressed dFOXO in adult fat body.** *Science* 2004,  
852 **305(5682):361.**
- 853 20. Billeter JC, Atallah J, Krupp JJ, Millar JG, Levine JD: **Specialized cells tag sexual and**  
854 **species identity in Drosophila melanogaster.** *Nature* 2009, **461(7266):987-991.**
- 855 21. Makki R, Cinnamon E, Gould AP: **The development and functions of oenocytes.**  
856 *Annual review of entomology* 2014, **59:405-425.**
- 857 22. Martins GF, Ramalho-Ortigao JM: **Oenocytes in insects.** *Invertebrate Survival Journal*  
858 2012, **9:139-152.**
- 859 23. Chatterjee D, Katewa SD, Qi Y, Jackson SA, Kapahi P, Jasper H: **Control of metabolic**  
860 **adaptation to fasting by dILP6-induced insulin signaling in Drosophila oenocytes.**  
861 *Proc Natl Acad Sci U S A* 2014, **111(50):17959-17964.**
- 862 24. Cinnamon E, Makki R, Sawala A, Wickenberg LP, Blomquist GJ, Tittiger C, Paroush Z,  
863 Gould AP: **Drosophila Spidey/Kar Regulates Oenocyte Growth via PI3-Kinase**  
864 **Signaling.** *PLoS Genet* 2016, **12(8):e1006154.**
- 865 25. Martins GF, Ramalho-Ortigao JM, Lobo NF, Severson DW, McDowell MA, Pimenta PF:  
866 **Insights into the transcriptome of oenocytes from Aedes aegypti pupae.** *Memorias do*  
867 *Instituto Oswaldo Cruz* 2011, **106(3):308-315.**
- 868 26. Johnson MB, Butterworth FM: **Maturation and aging of adult fat body and oenocytes**  
869 **in Drosophila as revealed by light microscopic morphometry.** *Journal of morphology*  
870 1985, **184(1):51-59.**
- 871 27. Tower J, Landis G, Gao R, Luan A, Lee J, Sun Y: **Variegated expression of Hsp22**  
872 **transgenic reporters indicates cell-specific patterns of aging in Drosophila**  
873 **oenocytes.** *The journals of gerontology Series A, Biological sciences and medical*  
874 *sciences* 2014, **69(3):253-259.**
- 875 28. Sanz E, Yang L, Su T, Morris DR, McKnight GS, Amieux PS: **Cell-type-specific**  
876 **isolation of ribosome-associated mRNA from complex tissues.** *Proc Natl Acad Sci U S*  
877 *A* 2009, **106(33):13939-13944.**
- 878 29. Peleg S, Feller C, Ladurner AG, Imhof A: **The Metabolic Impact on Histone**  
879 **Acetylation and Transcription in Ageing.** *Trends in biochemical sciences* 2016,  
880 **41(8):700-711.**
- 881 30. Hall H, Medina P, Cooper DA, Escobedo SE, Rounds J, Brennan KJ, Vincent C, Miura  
882 P, Doerge R, Weake VM: **Transcriptome profiling of aging Drosophila**  
883 **photoreceptors reveals gene expression trends that correlate with visual senescence.**  
884 *BMC genomics* 2017, **18(1):894.**
- 885 31. Pletcher SD, Macdonald SJ, Marguerie R, Certa U, Stearns SC, Goldstein DB, Partridge  
886 L: **Genome-wide transcript profiles in aging and calorically restricted Drosophila**  
887 **melanogaster.** *Curr Biol* 2002, **12(9):712-723.**
- 888 32. Alonso J, Santaren JF: **Characterization of the Drosophila melanogaster ribosomal**  
889 **proteome.** *Journal of proteome research* 2006, **5(8):2025-2032.**
- 890 33. Bloomer SA, Zhang HJ, Brown KE, Kregel KC: **Differential regulation of hepatic**  
891 **heme oxygenase-1 protein with aging and heat stress.** *The journals of gerontology*  
892 *Series A, Biological sciences and medical sciences* 2009, **64(4):419-425.**
- 893 34. Suh JH, Shenvi SV, Dixon BM, Liu H, Jaiswal AK, Liu RM, Hagen TM: **Decline in**  
894 **transcriptional activity of Nrf2 causes age-related loss of glutathione synthesis,**

- 895 **which is reversible with lipoic acid.** *Proc Natl Acad Sci U S A* 2004, **101**(10):3381-  
896 3386.
- 897 35. Mori K, Blackshear PE, Lobenhofer EK, Parker JS, Orzech DP, Roycroft JH, Walker KL,  
898 Johnson KA, Marsh TA, Irwin RD *et al*: **Hepatic transcript levels for genes coding for**  
899 **enzymes associated with xenobiotic metabolism are altered with age.** *Toxicologic*  
900 *pathology* 2007, **35**(2):242-251.
- 901 36. Xu C, Li CY, Kong AN: **Induction of phase I, II and III drug metabolism/transport**  
902 **by xenobiotics.** *Archives of pharmacal research* 2005, **28**(3):249-268.
- 903 37. Qiu Y, Tittiger C, Wicker-Thomas C, Le Goff G, Young S, Wajnberg E, Fricaux T,  
904 Taquet N, Blomquist GJ, Feyereisen R: **An insect-specific P450 oxidative**  
905 **decarbonylase for cuticular hydrocarbon biosynthesis.** *Proc Natl Acad Sci U S A*  
906 2012, **109**(37):14858-14863.
- 907 38. Narayan V, Ly T, Pourkarimi E, Murillo AB, Gartner A, Lamond AI, Kenyon C: **Deep**  
908 **Proteome Analysis Identifies Age-Related Processes in *C. elegans*.** *Cell systems* 2016,  
909 **3**(2):144-159.
- 910 39. Pandey UB, Nichols CD: **Human disease models in *Drosophila melanogaster* and the**  
911 **role of the fly in therapeutic drug discovery.** *Pharmacological reviews* 2011,  
912 **63**(2):411-436.
- 913 40. Chintapalli VR, Wang J, Dow JA: **Using FlyAtlas to identify better *Drosophila***  
914 ***melanogaster* models of human disease.** *Nat Genet* 2007, **39**(6):715-720.
- 915 41. Leader DP, Krause SA, Pandit A, Davies SA, Dow JAT: **FlyAtlas 2: a new version of**  
916 **the *Drosophila melanogaster* expression atlas with RNA-Seq, miRNA-Seq and sex-**  
917 **specific data.** *Nucleic Acids Res* 2018, **46**(D1):D809-D815.
- 918 42. Uhlen M, Fagerberg L, Hallstrom BM, Lindskog C, Oksvold P, Mardinoglu A,  
919 Sivertsson A, Kampf C, Sjostedt E, Asplund A *et al*: **Proteomics. Tissue-based map of**  
920 **the human proteome.** *Science* 2015, **347**(6220):1260419.
- 921 43. Hu Y, Flockhart I, Vinayagam A, Bergwitz C, Berger B, Perrimon N, Mohr SE: **An**  
922 **integrative approach to ortholog prediction for disease-focused and other functional**  
923 **studies.** *BMC bioinformatics* 2011, **12**:357.
- 924 44. Monnier V, Iche-Torres M, Rera M, Contremoulins V, Guichard C, Lalevee N, Tricoire  
925 H, Perrin L: **dJun and Vri/dNFIL3 are major regulators of cardiac aging in**  
926 ***Drosophila*.** *PLoS Genet* 2012, **8**(11):e1003081.
- 927 45. Chen H, Zheng X, Zheng Y: **Age-associated loss of lamin-B leads to systemic**  
928 **inflammation and gut hyperplasia.** *Cell* 2014, **159**(4):829-843.
- 929 46. Resnik-Docampo M, Koehler CL, Clark RI, Schinaman JM, Sauer V, Wong DM, Lewis  
930 S, D'Alterio C, Walker DW, Jones DL: **Tricellular junctions regulate intestinal stem**  
931 **cell behaviour to maintain homeostasis.** *Nat Cell Biol* 2017, **19**(1):52-59.
- 932 47. Martins GF, Guedes BA, Silva LM, Serrao JE, Fortes-Dias CL, Ramalho-Ortigao JM,  
933 Pimenta PF: **Isolation, primary culture and morphological characterization of**  
934 **oenocytes from *Aedes aegypti* pupae.** *Tissue & cell* 2011, **43**(2):83-90.
- 935 48. Jackson A, Locke M: **The formation of plasma membrane reticular systems in the**  
936 **oenocytes of an insect.** *Tissue & cell* 1989, **21**(3):463-473.
- 937 49. Ferveur JF, Savarit F, O'Kane CJ, Sureau G, Greenspan RJ, Jallon JM: **Genetic**  
938 **feminization of pheromones and its behavioral consequences in *Drosophila* males.**  
939 *Science* 1997, **276**(5318):1555-1558.

- 940 50. Parvy JP, Napal L, Rubin T, Poidevin M, Perrin L, Wicker-Thomas C, Montagne J:  
941 **Drosophila melanogaster Acetyl-CoA-carboxylase sustains a fatty acid-dependent**  
942 **remote signal to waterproof the respiratory system.** *PLoS Genet* 2012, **8**(8):e1002925.
- 943 51. Laffel L: **Ketone bodies: a review of physiology, pathophysiology and application of**  
944 **monitoring to diabetes.** *Diabetes/metabolism research and reviews* 1999, **15**(6):412-  
945 426.
- 946 52. Bailey EJ, Horne JA, Izatt ME, Hill L: **Concentrations of acetoacetate and 3-**  
947 **hydroxybutyrate in pigeon blood and desert locust haemolymph.** *Life sciences Pt 2:*  
948 *Biochemistry, general and molecular biology* 1971, **10**(24):1415-1419.
- 949 53. Hill L, Izatt MEG, Horne JA, Bailey E: **Factors affecting concentrations of**  
950 **acetoacetate and d-3-hydroxybutyrate in haemolymph and tissues of the adult**  
951 **desert locust.** *Journal of insect physiology* 1972, **18**(7):1265-1285.
- 952 54. Shah J, Bailey E: **Enzymes of ketogenesis in the fat body and the thoracic muscle of**  
953 **the adult cockroach.** *Insect Biochemistry* 1976, **6**(3):251-254.
- 954 55. Howard RW, Blomquist GJ: **Ecological, behavioral, and biochemical aspects of insect**  
955 **hydrocarbons.** *Annual review of entomology* 2005, **50**:371-393.
- 956 56. Chiang YN, Tan KJ, Chung H, Lavrynenko O, Shevchenko A, Yew JY: **Steroid**  
957 **Hormone Signaling Is Essential for Pheromone Production and Oenocyte Survival.**  
958 *PLoS Genet* 2016, **12**(6):e1006126.
- 959 57. Gaziova I, Bonnette PC, Henrich VC, Jindra M: **Cell-autonomous roles of the**  
960 **ecdysoneless gene in Drosophila development and oogenesis.** *Development* 2004,  
961 **131**(11):2715-2725.
- 962 58. Uryu O, Ameku T, Niwa R: **Recent progress in understanding the role of ecdysteroids**  
963 **in adult insects: Germline development and circadian clock in the fruit fly**  
964 **Drosophila melanogaster.** *Zoological letters* 2015, **1**:32.
- 965 59. Romer F, Emmerich H, Nowock J: **Biosynthesis of ecdysones in isolated prothoracic**  
966 **glands and oenocytes of Tenebrio molitor in vitro.** *Journal of insect physiology* 1974,  
967 **20**(10):1975-1987.
- 968 60. Yamazaki Y, Kiuchi M, Takeuchi H, Kubo T: **Ecdysteroid biosynthesis in workers of**  
969 **the European honeybee Apis mellifera L.** *Insect biochemistry and molecular biology*  
970 2011, **41**(5):283-293.
- 971 61. Zheng W, Rus F, Hernandez A, Kang P, Goldman W, Silverman N, Tatar M:  
972 **Dehydration triggers ecdysone-mediated recognition-protein priming and elevated**  
973 **anti-bacterial immune responses in Drosophila Malpighian tubule renal cells.** *BMC*  
974 *biology* 2018, **16**(1):60.
- 975 62. Zhan M, Yamaza H, Sun Y, Sinclair J, Li H, Zou S: **Temporal and spatial**  
976 **transcriptional profiles of aging in Drosophila melanogaster.** *Genome research* 2007,  
977 **17**(8):1236-1243.
- 978 63. Wanders RJ, Waterham HR: **Biochemistry of mammalian peroxisomes revisited.**  
979 *Annual review of biochemistry* 2006, **75**:295-332.
- 980 64. Fujiki Y, Okumoto K, Mukai S, Honsho M, Tamura S: **Peroxisome biogenesis in**  
981 **mammalian cells.** *Frontiers in physiology* 2014, **5**:307.
- 982 65. Legakis JE, Koepke JI, Jedeszko C, Barlaskar F, Terlecky LJ, Edwards HJ, Walton PA,  
983 Terlecky SR: **Peroxisome senescence in human fibroblasts.** *Molecular biology of the*  
984 *cell* 2002, **13**(12):4243-4255.

- 985 66. Haining JL, Legan JS: **Catalase turnover in rat liver and kidney as a function of age.**  
986 *Experimental gerontology* 1973, **8**(2):85-91.
- 987 67. Semsei I, Rao G, Richardson A: **Changes in the expression of superoxide dismutase**  
988 **and catalase as a function of age and dietary restriction.** *Biochemical and biophysical*  
989 *research communications* 1989, **164**(2):620-625.
- 990 68. Xia E, Rao G, Van Remmen H, Heydari AR, Richardson A: **Activities of antioxidant**  
991 **enzymes in various tissues of male Fischer 344 rats are altered by food restriction.**  
992 *The Journal of nutrition* 1995, **125**(2):195-201.
- 993 69. Ivashchenko O, Van Veldhoven PP, Brees C, Ho YS, Terlecky SR, Fransen M:  
994 **Intraperoxisomal redox balance in mammalian cells: oxidative stress and**  
995 **interorganellar cross-talk.** *Molecular biology of the cell* 2011, **22**(9):1440-1451.
- 996 70. Perichon R, Bourre JM: **Peroxisomal beta-oxidation activity and catalase activity**  
997 **during development and aging in mouse liver.** *Biochimie* 1995, **77**(4):288-293.
- 998 71. Weir HJ, Yao P, Huynh FK, Escoubas CC, Goncalves RL, Burkewitz K, Laboy R,  
999 Hirschey MD, Mair WB: **Dietary Restriction and AMPK Increase Lifespan via**  
1000 **Mitochondrial Network and Peroxisome Remodeling.** *Cell Metab* 2017, **26**(6):884-  
1001 896 e885.
- 1002 72. Houtkooper RH, Argmann C, Houten SM, Canto C, Jenning EH, Andreux PA, Thomas  
1003 C, Doenlen R, Schoonjans K, Auwerx J: **The metabolic footprint of aging in mice.**  
1004 *Scientific reports* 2011, **1**:134.
- 1005 73. Poirier Y, Antonenkov VD, Glumoff T, Hiltunen JK: **Peroxisomal beta-oxidation--a**  
1006 **metabolic pathway with multiple functions.** *Biochimica et biophysica acta* 2006,  
1007 **1763**(12):1413-1426.
- 1008 74. Singh J, Khan M, Singh I: **Silencing of Abcd1 and Abcd2 genes sensitizes astrocytes**  
1009 **for inflammation: implication for X-adrenoleukodystrophy.** *Journal of lipid research*  
1010 2009, **50**(1):135-147.
- 1011 75. Pujol A, Hindelang C, Callizot N, Bartsch U, Schachner M, Mandel JL: **Late onset**  
1012 **neurological phenotype of the X-ALD gene inactivation in mice: a mouse model for**  
1013 **adrenomyeloneuropathy.** *Human molecular genetics* 2002, **11**(5):499-505.
- 1014 76. Seedorf U, Raabe M, Ellinghaus P, Kannenberg F, Fobker M, Engel T, Denis S, Wouters  
1015 F, Wirtz KW, Wanders RJ *et al*: **Defective peroxisomal catabolism of branched fatty**  
1016 **acyl coenzyme A in mice lacking the sterol carrier protein-2/sterol carrier protein-x**  
1017 **gene function.** *Genes & development* 1998, **12**(8):1189-1201.
- 1018 77. Im SS, Yousef L, Blaschitz C, Liu JZ, Edwards RA, Young SG, Raffatellu M, Osborne  
1019 TF: **Linking lipid metabolism to the innate immune response in macrophages**  
1020 **through sterol regulatory element binding protein-1a.** *Cell Metab* 2011, **13**(5):540-  
1021 549.
- 1022 78. Di Cara F, Sheshachalam A, Braverman NE, Rachubinski RA, Simmonds AJ:  
1023 **Peroxisome-Mediated Metabolism Is Required for Immune Response to Microbial**  
1024 **Infection.** *Immunity* 2017, **47**(1):93-106 e107.
- 1025 79. Li Z, Li J, Bu X, Liu X, Tankersley CG, Wang C, Huang K: **Age-induced augmentation**  
1026 **of p38 MAPK phosphorylation in mouse lung.** *Experimental gerontology* 2011,  
1027 **46**(8):694-702.
- 1028 80. Kim HJ, Jung KJ, Yu BP, Cho CG, Chung HY: **Influence of aging and calorie**  
1029 **restriction on MAPKs activity in rat kidney.** *Experimental gerontology* 2002, **37**(8-  
1030 9):1041-1053.

- 1031 81. Kim EK, Choi EJ: **Pathological roles of MAPK signaling pathways in human**  
1032 **diseases.** *Biochimica et biophysica acta* 2010, **1802**(4):396-405.
- 1033 82. Vrailas-Mortimer A, del Rivero T, Mukherjee S, Nag S, Gaitanidis A, Kadas D,  
1034 Consoulas C, Duttaroy A, Sanyal S: **A muscle-specific p38 MAPK/Mef2/MnSOD**  
1035 **pathway regulates stress, motor function, and life span in Drosophila.** *Developmental*  
1036 *cell* 2011, **21**(4):783-795.
- 1037 83. Wang MC, Bohmann D, Jasper H: **JNK signaling confers tolerance to oxidative stress**  
1038 **and extends lifespan in Drosophila.** *Developmental cell* 2003, **5**(5):811-816.
- 1039 84. Oh SW, Mukhopadhyay A, Svrzikapa N, Jiang F, Davis RJ, Tissenbaum HA: **JNK**  
1040 **regulates lifespan in Caenorhabditis elegans by modulating nuclear translocation of**  
1041 **forkhead transcription factor/DAF-16.** *Proc Natl Acad Sci U S A* 2005, **102**(12):4494-  
1042 4499.
- 1043 85. Biteau B, Karpac J, Hwangbo D, Jasper H: **Regulation of Drosophila lifespan by JNK**  
1044 **signaling.** *Experimental gerontology* 2011, **46**(5):349-354.
- 1045 86. Johnson GL, Nakamura K: **The c-jun kinase/stress-activated pathway: regulation,**  
1046 **function and role in human disease.** *Biochimica et biophysica acta* 2007,  
1047 **1773**(8):1341-1348.
- 1048 87. Sun J, Kale SP, Childress AM, Pinswasdi C, Jazwinski SM: **Divergent roles of RAS1**  
1049 **and RAS2 in yeast longevity.** *J Biol Chem* 1994, **269**(28):18638-18645.
- 1050 88. Slack C, Alic N, Foley A, Cabecinha M, Hoddinott MP, Partridge L: **The Ras-Erk-ETS-**  
1051 **Signaling Pathway Is a Drug Target for Longevity.** *Cell* 2015, **162**(1):72-83.
- 1052 89. Nanji M, Hopper NA, Gems D: **LET-60 RAS modulates effects of insulin/IGF-1**  
1053 **signaling on development and aging in Caenorhabditis elegans.** *Aging Cell* 2005,  
1054 **4**(5):235-245.
- 1055 90. Thyagarajan B, Blaszczyk AG, Chandler KJ, Watts JL, Johnson WE, Graves BJ: **ETS-4**  
1056 **is a transcriptional regulator of life span in Caenorhabditis elegans.** *PLoS Genet*  
1057 2010, **6**(9):e1001125.
- 1058 91. Owusu-Ansah E, Yavari A, Banerjee U: **A protocol for in vivo detection of reactive**  
1059 **oxygen species.** *Protocol Exchange* 2008.
- 1060 92. Afgan E, Baker D, van den Beek M, Blankenberg D, Bouvier D, Cech M, Chilton J,  
1061 Clements D, Coraor N, Eberhard C *et al*: **The Galaxy platform for accessible,**  
1062 **reproducible and collaborative biomedical analyses: 2016 update.** *Nucleic Acids Res*  
1063 2016, **44**(W1):W3-W10.
- 1064 93. Kim D, Pertea G, Trapnell C, Pimentel H, Kelley R, Salzberg SL: **TopHat2: accurate**  
1065 **alignment of transcriptomes in the presence of insertions, deletions and gene**  
1066 **fusions.** *Genome biology* 2013, **14**(4):R36.
- 1067 94. Trapnell C, Roberts A, Goff L, Pertea G, Kim D, Kelley DR, Pimentel H, Salzberg SL,  
1068 Rinn JL, Pachter L: **Differential gene and transcript expression analysis of RNA-seq**  
1069 **experiments with TopHat and Cufflinks.** *Nature protocols* 2012, **7**(3):562-578.
- 1070 95. Love MI, Huber W, Anders S: **Moderated estimation of fold change and dispersion**  
1071 **for RNA-seq data with DESeq2.** *Genome biology* 2014, **15**(12):550.
- 1072 96. Subramanian A, Tamayo P, Mootha VK, Mukherjee S, Ebert BL, Gillette MA, Paulovich  
1073 A, Pomeroy SL, Golub TR, Lander ES *et al*: **Gene set enrichment analysis: a**  
1074 **knowledge-based approach for interpreting genome-wide expression profiles.** *Proc*  
1075 *Natl Acad Sci U S A* 2005, **102**(43):15545-15550.



- 1076 97. Pfaffl MW, Tichopad A, Prgomet C, Neuvians TP: **Determination of stable**  
1077 **housekeeping genes, differentially regulated target genes and sample integrity:**  
1078 **BestKeeper--Excel-based tool using pair-wise correlations.** *Biotechnology letters*  
1079 2004, **26**(6):509-515.  
1080 98. Schmittgen TD, Livak KJ: **Analyzing real-time PCR data by the comparative C(T)**  
1081 **method.** *Nature protocols* 2008, **3**(6):1101-1108.  
1082

Table 1. Comparison of the GO terms enriched in oenocyte, fat body and liver

| GO                        | Oenocyte                                                                                                                                                                                                                            | Fat body                                                                                                                               | Liver                                                                                                                                                                                                                           |
|---------------------------|-------------------------------------------------------------------------------------------------------------------------------------------------------------------------------------------------------------------------------------|----------------------------------------------------------------------------------------------------------------------------------------|---------------------------------------------------------------------------------------------------------------------------------------------------------------------------------------------------------------------------------|
| <b>Biological Process</b> | <ul style="list-style-type: none"> <li>Fatty acid biosynthesis</li> <li>Fatty acid elongation</li> <li>Oxidation reduction</li> <li>Immune response</li> <li>Proteasome-mediated protein catabolic process</li> </ul>               | <ul style="list-style-type: none"> <li>Carboxylic acid metabolism</li> <li>Immune response</li> <li>Amino acid metabolism</li> </ul>   | <ul style="list-style-type: none"> <li>Lipid metabolism</li> <li>Long-chain fatty acid metabolism</li> <li>Oxidation reduction</li> <li>Immune response</li> <li>Xenobiotic metabolism</li> <li>Bile acid metabolism</li> </ul> |
| <b>Molecular Function</b> | <ul style="list-style-type: none"> <li>Oxidoreductase activity</li> <li>Threonine-type endopeptidase activity</li> <li>Fatty acid synthase activity</li> <li>Fatty acid elongase activity</li> <li>Peptidoglycan binding</li> </ul> | <ul style="list-style-type: none"> <li>Oxidoreductase activity</li> <li>Metalloendopeptidase activity</li> <li>Heme binding</li> </ul> | <ul style="list-style-type: none"> <li>Oxidoreductase activity</li> <li>Serine-type peptidase activity</li> <li>Lipid binding</li> <li>Heme binding</li> </ul>                                                                  |
| <b>Cellular Component</b> | <ul style="list-style-type: none"> <li>Peroxisome</li> <li>Proteasome</li> </ul>                                                                                                                                                    | <ul style="list-style-type: none"> <li>Extracellular region</li> </ul>                                                                 | <ul style="list-style-type: none"> <li>Peroxisome</li> <li>Extracellular region</li> <li>Endoplasmic reticulum</li> </ul>                                                                                                       |
| <b>KEGG Pathway</b>       | <ul style="list-style-type: none"> <li>Metabolism of xenobiotics</li> <li>Peroxisome</li> <li>Proteasome</li> <li>Ketone body metabolism</li> <li>Biosynthesis of unsaturated fatty acids</li> </ul>                                | <ul style="list-style-type: none"> <li>Glycine, serine and threonine metabolism</li> <li>Arginine and proline metabolism</li> </ul>    | <ul style="list-style-type: none"> <li>Metabolism of xenobiotics</li> <li>Peroxisome</li> <li>Bile secretion</li> <li>PPAR signaling pathway</li> <li>Retinol metabolism</li> <li>Biosynthesis of amino acids</li> </ul>        |
| <b>Protein Domain</b>     | <ul style="list-style-type: none"> <li>ELO family</li> <li>Proteasome subunit</li> </ul>                                                                                                                                            | <ul style="list-style-type: none"> <li>Peptidase S1, M13</li> <li>EGF-like domain</li> </ul>                                           | <ul style="list-style-type: none"> <li>Serpin family</li> <li>Cytochrome P450</li> </ul>                                                                                                                                        |

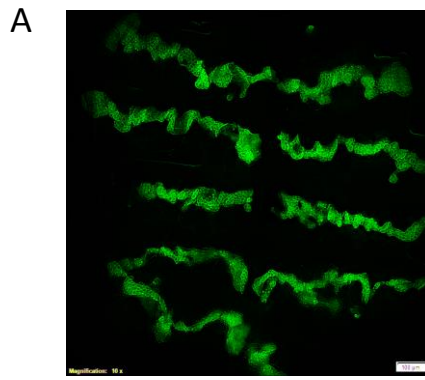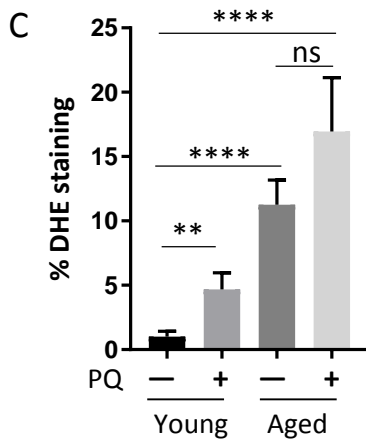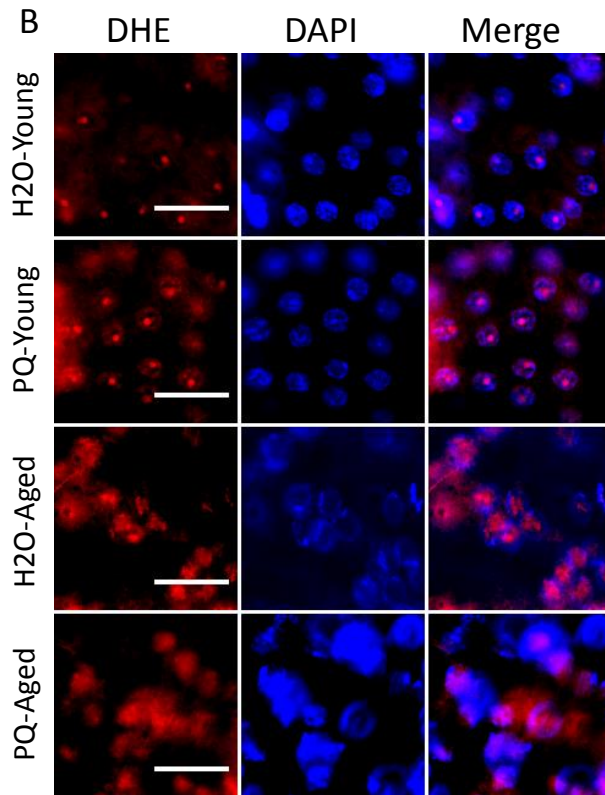

**A Oenocyte Ribo-Tag**  
PromE-gal4 x UAS-RpL13A-FLAG

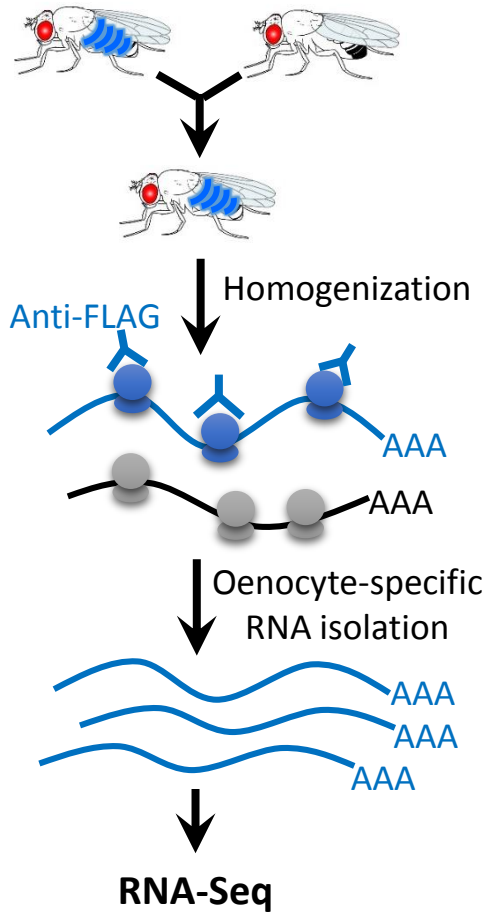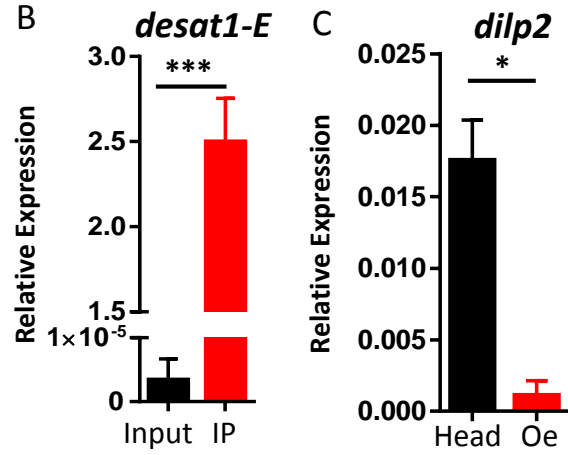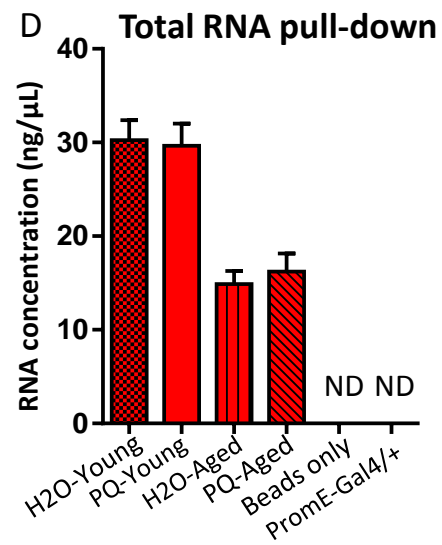

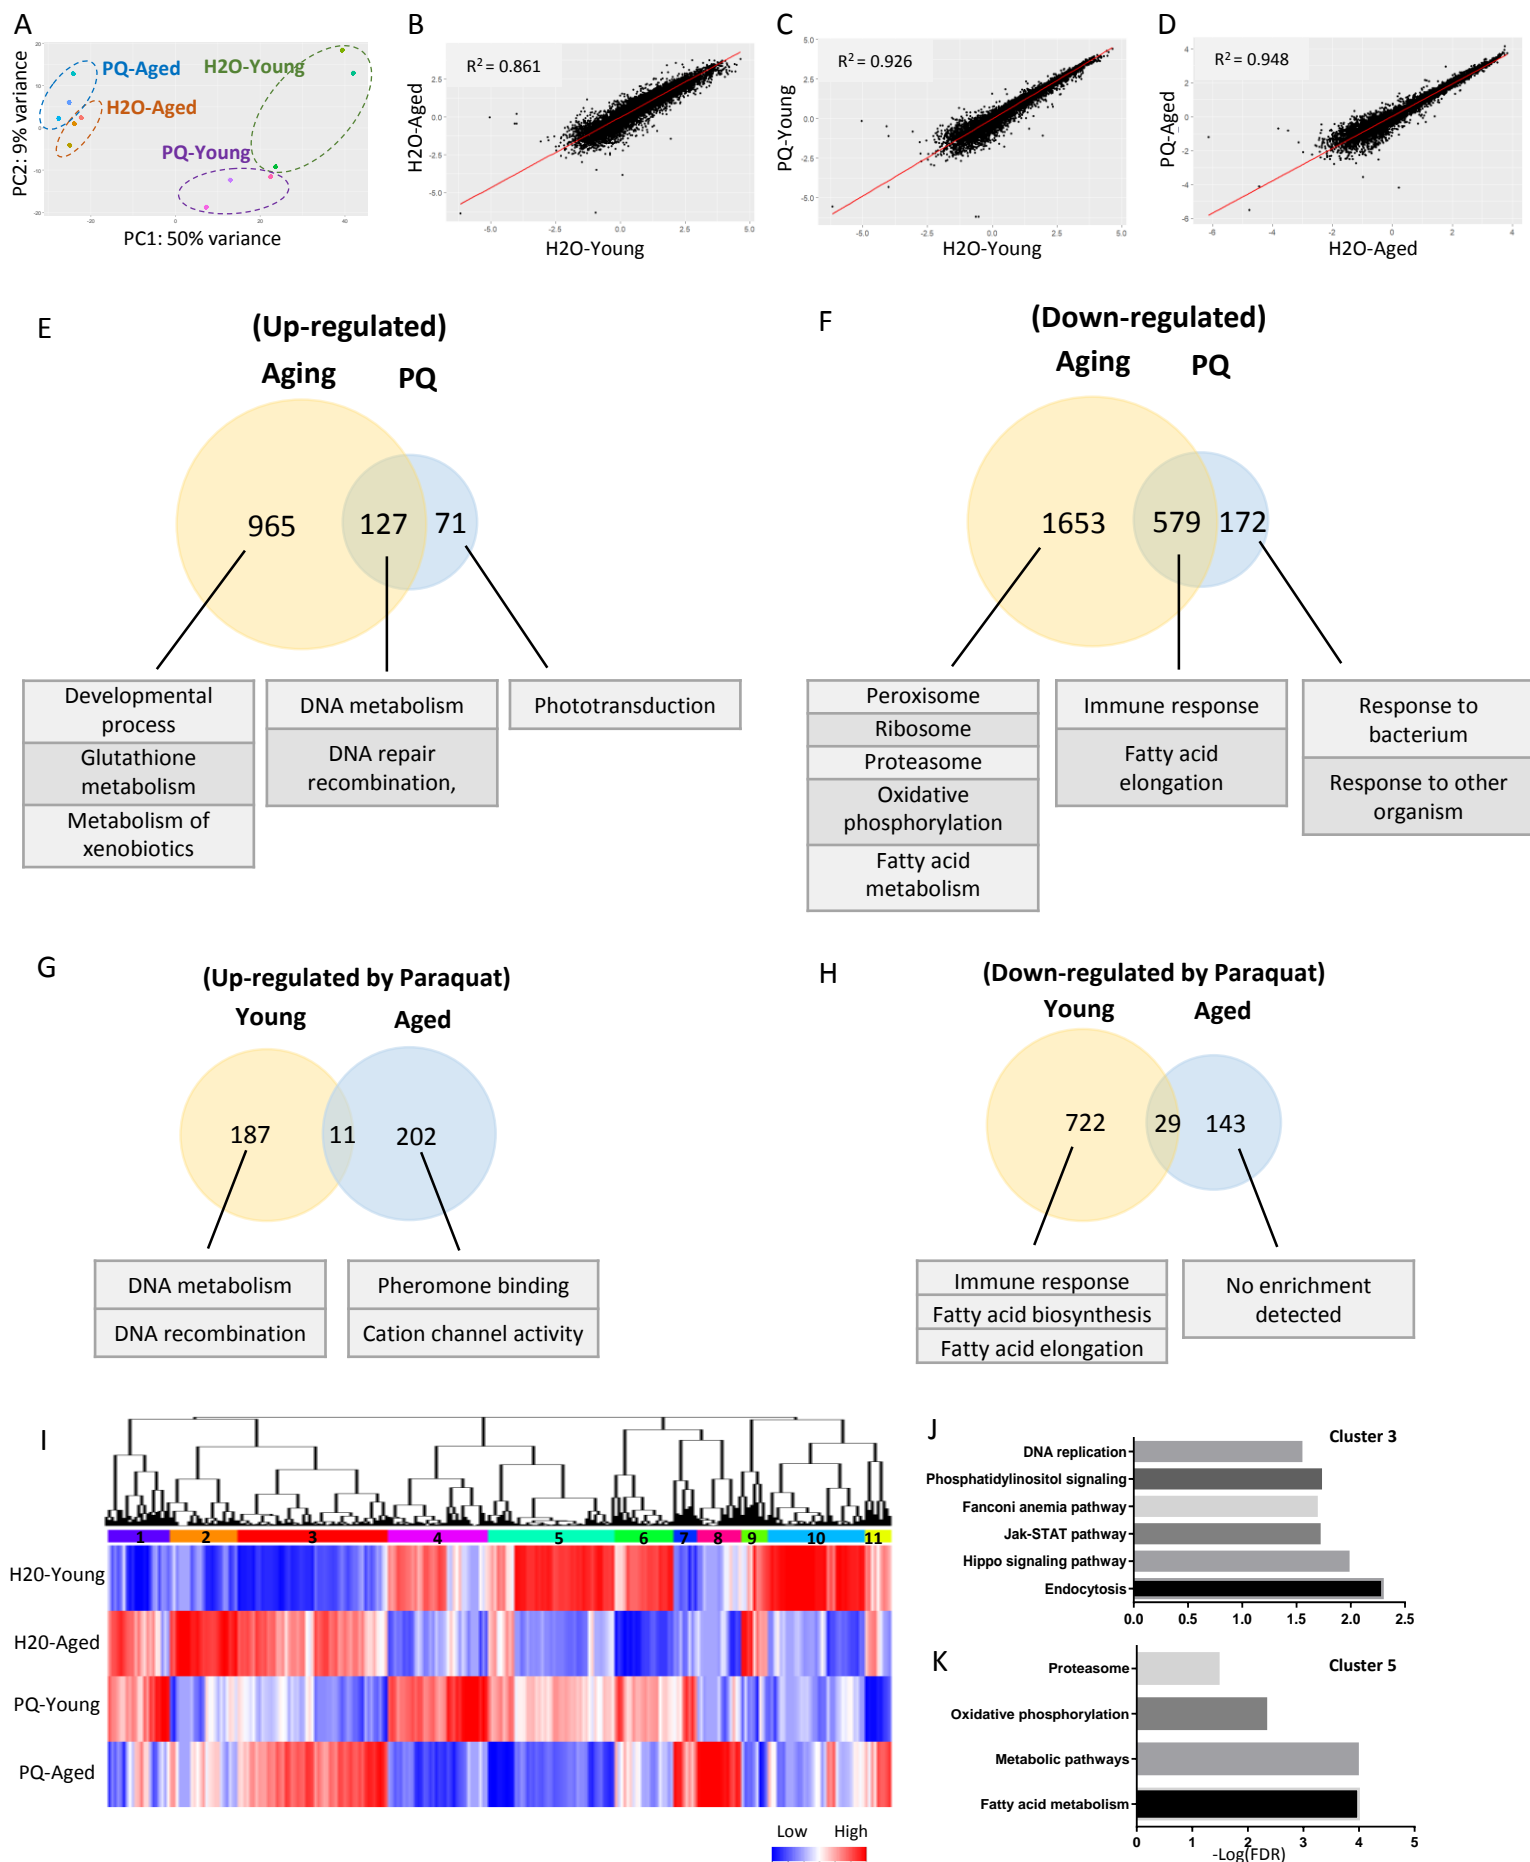

### A Up-regulated in aged oenocytes

| NAME                       | ES    | FDR   |
|----------------------------|-------|-------|
| MISMATCH REPAIR            | -0.65 | 0.025 |
| DNA REPLICATION            | -0.59 | 0.028 |
| BASE EXCISION REPAIR       | -0.61 | 0.035 |
| NUCLEOTIDE EXCISION REPAIR | -0.53 | 0.037 |
| FANCONI ANEMIA PATHWAY     | -0.56 | 0.039 |
| GLUTATHIONE S TRANSFERASE  | -0.38 | 0.055 |

### B Down-regulated in aged oenocytes

| NAME                                    | ES   | FDR   |
|-----------------------------------------|------|-------|
| OXIDATIVE PHOSPHORYLATION               | 0.60 | 0.001 |
| RIBOSOME                                | 0.57 | 0.001 |
| PROTEASOME                              | 0.65 | 0.002 |
| CARBON METABOLISM                       | 0.52 | 0.007 |
| THIAMINE METABOLISM                     | 0.70 | 0.008 |
| PEROXISOME                              | 0.53 | 0.008 |
| PENTOSE PHOSPHATE                       | 0.66 | 0.013 |
| NEUROACTIVE LIGAND-RECEPTOR INTERACTION | 0.55 | 0.015 |
| GALACTOSE METABOLISM                    | 0.59 | 0.016 |
| GLYCOLYSIS                              | 0.53 | 0.033 |
| FATTY ACID METABOLISM                   | 0.54 | 0.033 |
| GLYOXYLATE METABOLISM                   | 0.56 | 0.044 |
| GLYCINE METABOLISM                      | 0.56 | 0.045 |
| FATTY ACID ELONGATION                   | 0.63 | 0.049 |
| CYTOCHROME P450                         | 0.36 | 0.095 |

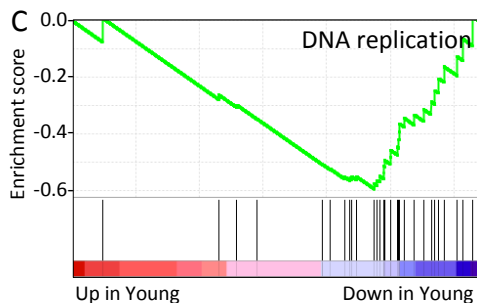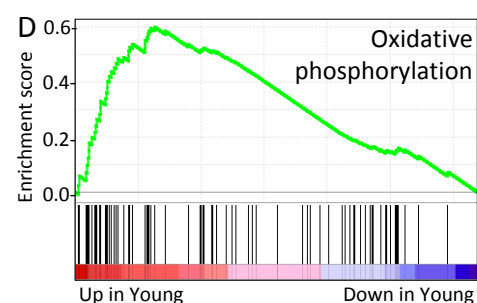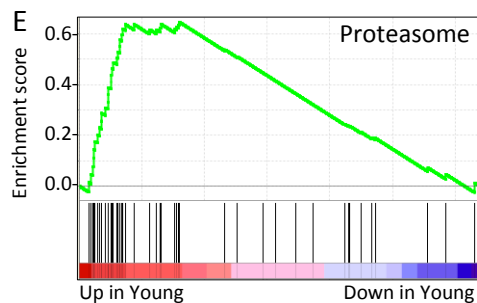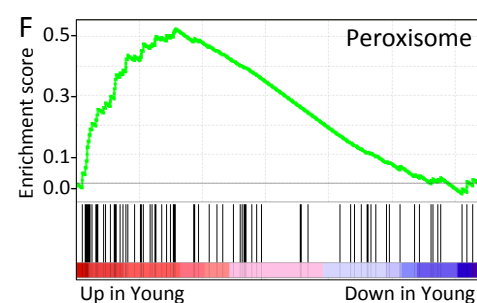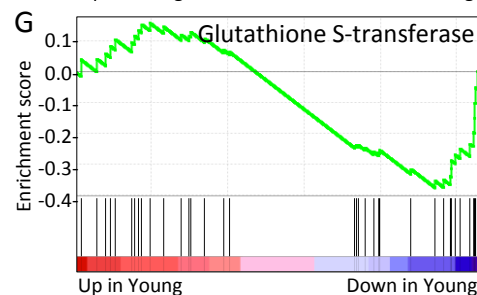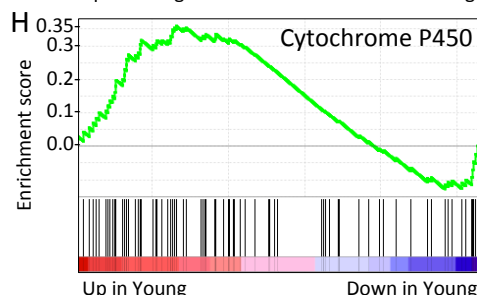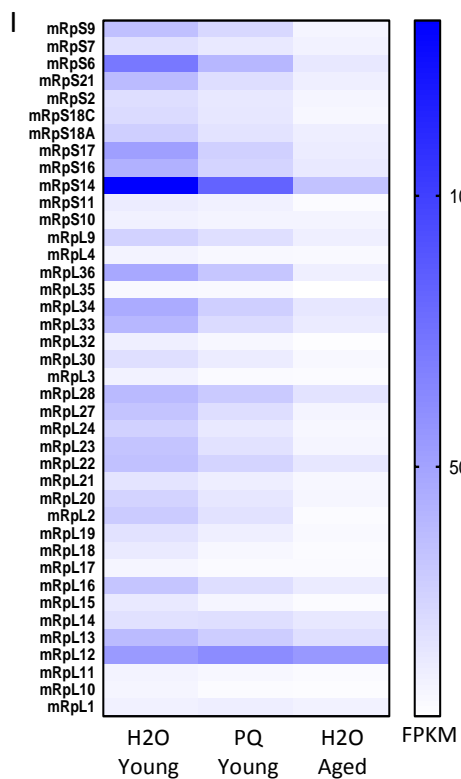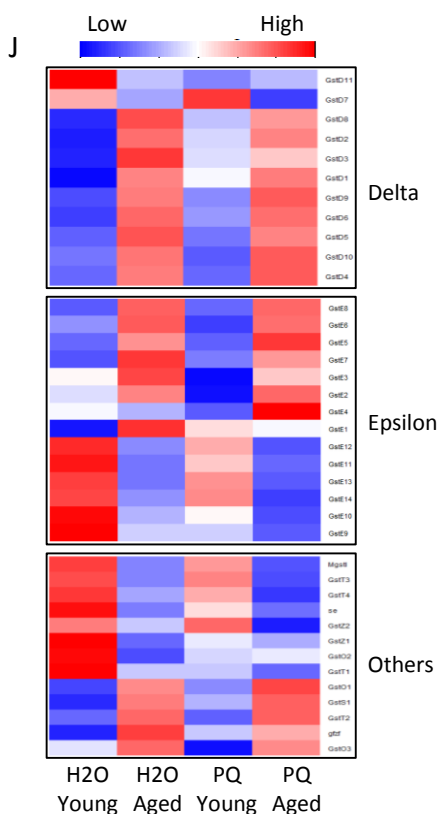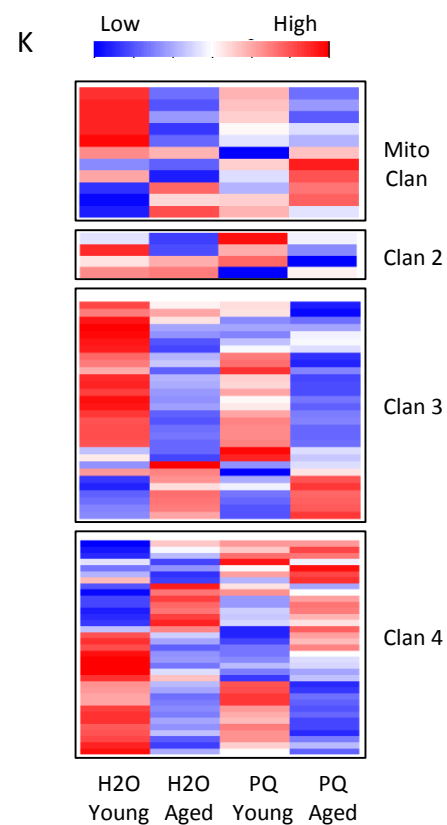

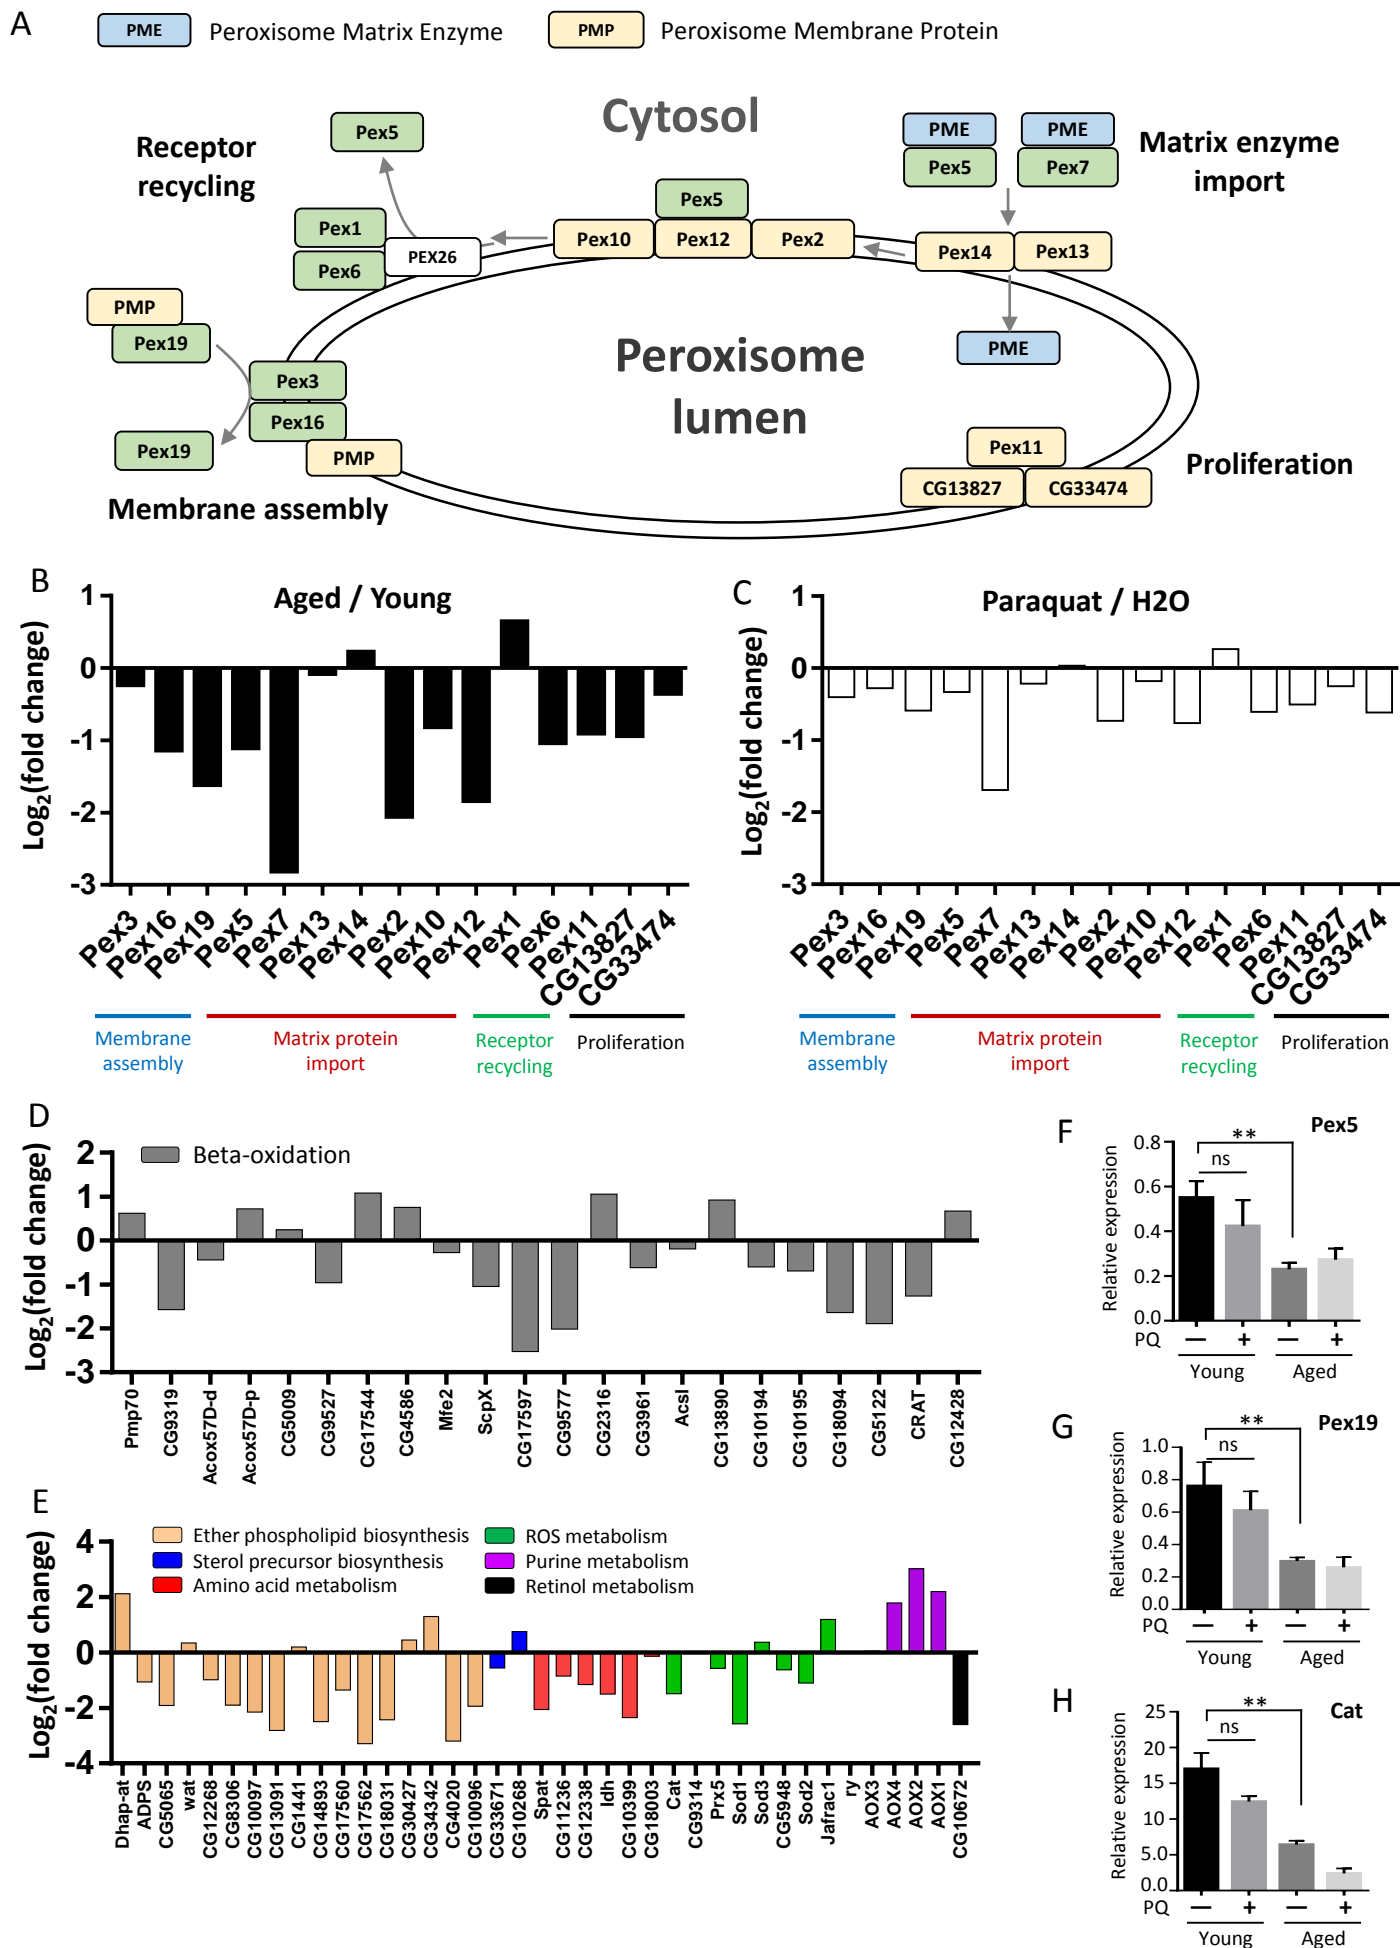

| A | Ketogenesis enzyme                | Oenocyte                             | Liver                                     |
|---|-----------------------------------|--------------------------------------|-------------------------------------------|
| 1 | HMG-CoA synthase                  | <i>Hmgs</i> (7.7x)                   | <i>HMGCS1</i> (4.4x), <i>HMGCS2</i> (16x) |
| 2 | HMG-CoA lyase                     | <i>CG10399</i> (8.2x)                | <i>HMGCL</i> (3.9x), <i>HMGCLL1</i>       |
| 3 | D-β-hydroxybutyrate dehydrogenase | <i>Shroud</i> (3.6x), <i>CG13377</i> | <i>BDH1</i> (12.9x), <i>BDH2</i>          |

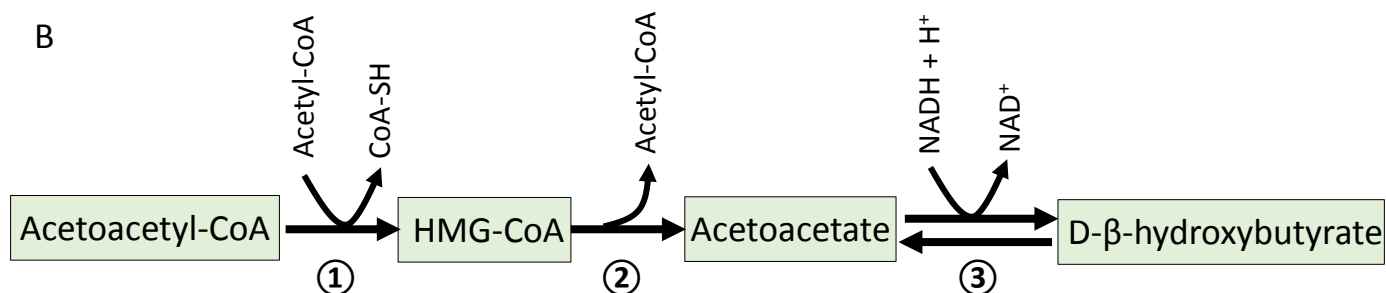

| C | Fatty acid elongation (in SER)                | Oenocyte                                                                                      | Liver                                                                                                               |
|---|-----------------------------------------------|-----------------------------------------------------------------------------------------------|---------------------------------------------------------------------------------------------------------------------|
| 1 | Very-long-chain 3-ketoacyl-CoA synthase       | <i>Elo68beta</i> , <i>Elo68alpha</i> , <i>CG17821</i> , <i>CG18609</i> (19X), <i>Baldspot</i> | <i>ELOVL1</i> , <i>ELOVL2</i> (5.2x), <i>ELOVL3</i> , <i>ELOVL4</i> , <i>ELOVL5</i> , <i>ELOVL6</i> , <i>ELOVL7</i> |
| 2 | Very-long-chain 3-ketoacyl-CoA reductase      | <i>Spidey</i> (20.7x)                                                                         | <i>HSD17B12</i>                                                                                                     |
| 3 | Very-long-chain 3-hydroxyacyl-CoA dehydratase | <i>CG6746</i> (29.6x), <i>CG9267</i>                                                          | <i>HACD1</i> , <i>HACD2</i> , <i>HACD3</i> , <i>HACD4</i>                                                           |
| 4 | Very-long-chain enoyl-CoA reductase           | <i>Sc2</i> (21.5x)                                                                            | <i>TECR</i>                                                                                                         |

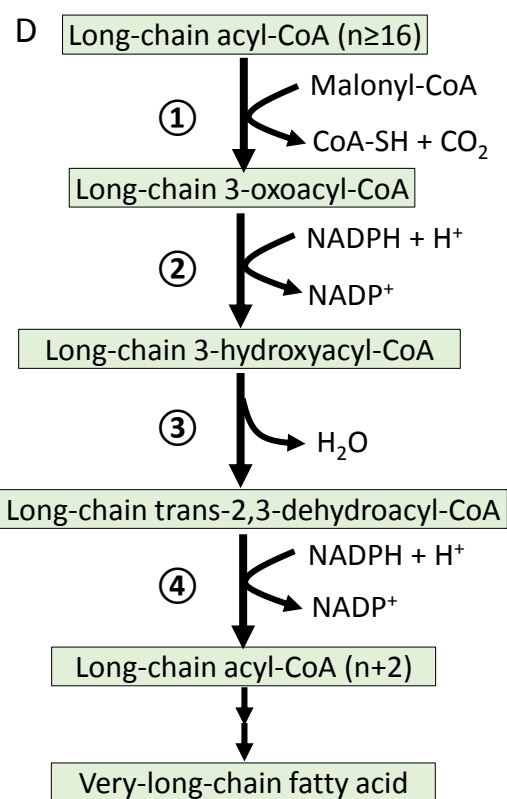



A

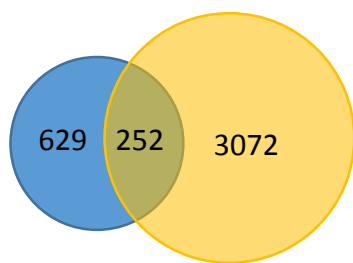

Mouse liver

Fly oenocyte

|                        |                        |
|------------------------|------------------------|
| Immune response        | Glutathione metabolism |
| Apoptosis              | DNA repair             |
| Peroxisome             | Peroxisome             |
| Bile acid biosynthesis | Ribosome, Proteasome   |
| Fatty acid metabolism  | Fatty acid metabolism  |

B Up-regulated in aging

| Pathways      | Oenocyte        | Liver         |
|---------------|-----------------|---------------|
| MAPK          | <i>kay</i>      | <i>c-Fos</i>  |
|               | <i>Shark</i>    | <i>Zap70</i>  |
|               | <i>htl</i>      | <i>FGFR3</i>  |
| Ras signaling | <i>RhoGAP1A</i> | <i>ABR</i>    |
|               | <i>plexB</i>    | <i>PLXNB1</i> |
| NF-κB         | <i>Tl</i>       | <i>TLR1</i>   |
|               |                 | <i>TLR2</i>   |
|               |                 | <i>TLR3</i>   |
|               |                 | <i>TLR8</i>   |
| JAK-STAT      | <i>CycD</i>     | <i>CCND1</i>  |

C Down-regulated in aging

| Pathways                  | Oenocyte       | Liver         |
|---------------------------|----------------|---------------|
| Peroxisome                | <i>ScpX</i>    | <i>SCP2</i>   |
| Fatty acid metabolism     | <i>CG18609</i> | <i>ELOVL3</i> |
|                           | <i>Alas</i>    | <i>ALAS1</i>  |
| Oxidative phosphorylation | <i>CG17928</i> | <i>FADS3</i>  |
|                           | <i>COX6B</i>   | <i>COX6B2</i> |
|                           | <i>ninaB</i>   | <i>BCMO1</i>  |
|                           | <i>olf413</i>  | <i>MOXD1</i>  |

D Fly

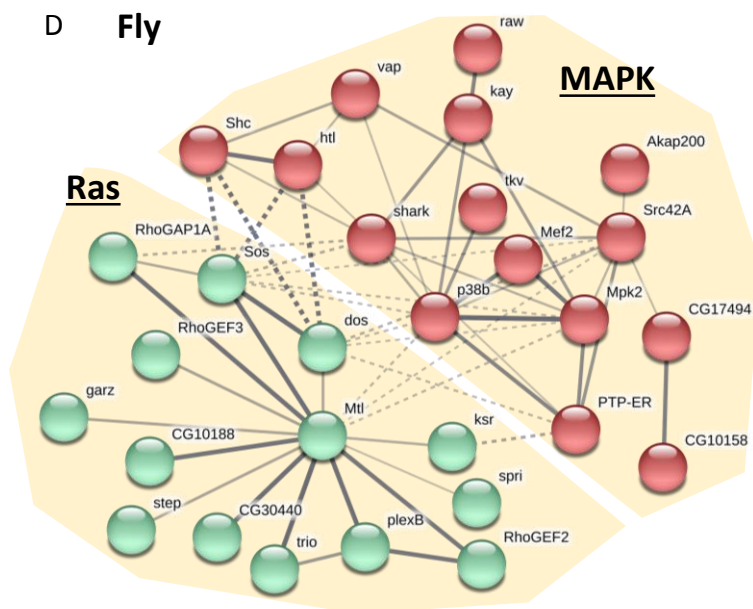

E Mouse

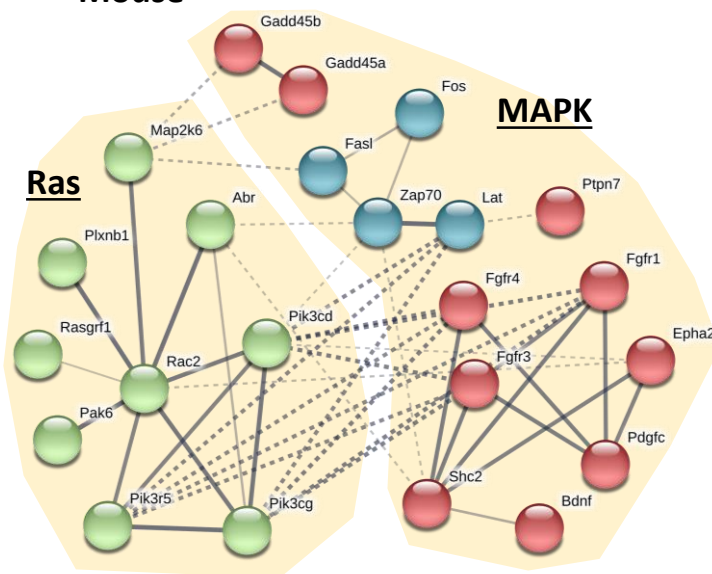

F

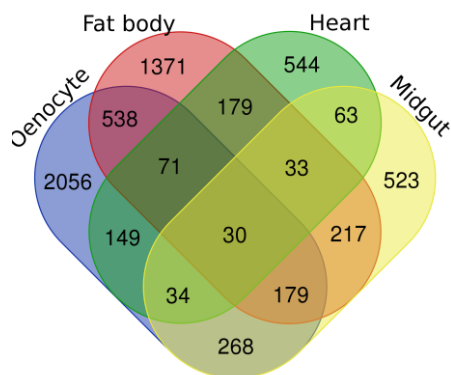

G

| Oenocyte                  | Fat body                             | Heart                        | Midgut                 |
|---------------------------|--------------------------------------|------------------------------|------------------------|
| Proteasome                | Aminoglycan metabolism               | Immune response              | Ion transport          |
| Ribosome                  | Chitin metabolic process             | Glycolysis / Gluconeogenesis | DNA replication        |
| Oxidative phosphorylation | Detoxification of inorganic compound | Oxidative phosphorylation    | Fatty acid degradation |

Figure S1

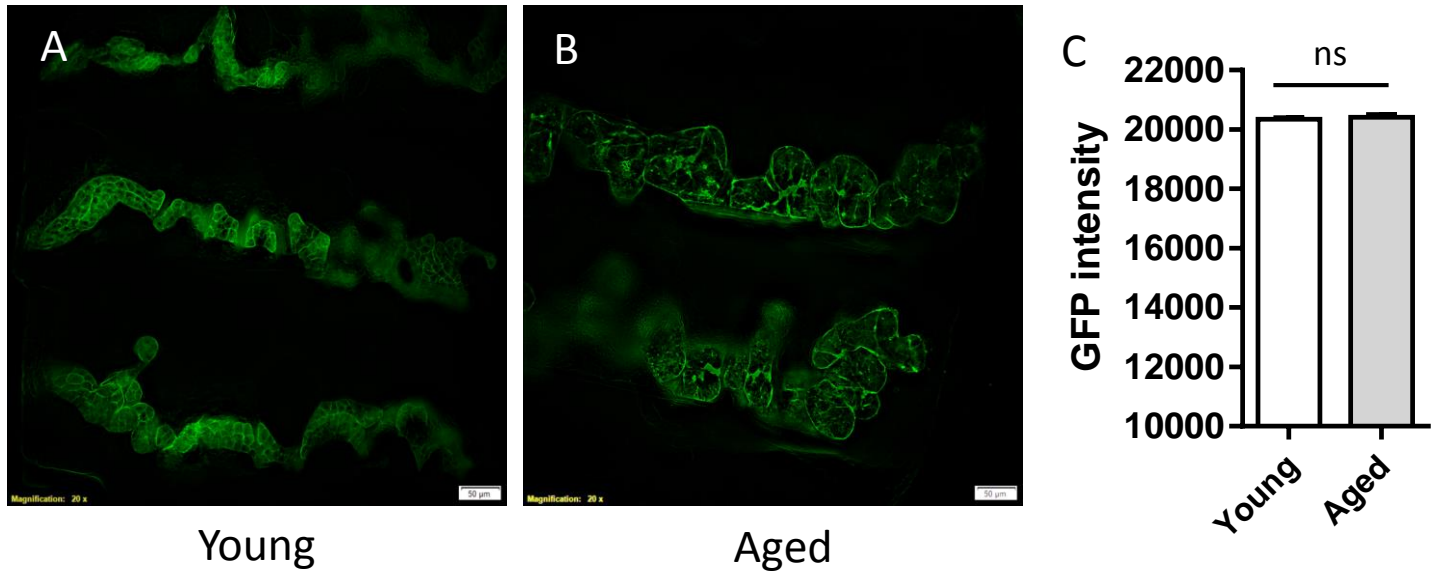

*PromE-Gal4; UAS-CD8::GFP*

### Ecdysteroid hormone metabolism pathway

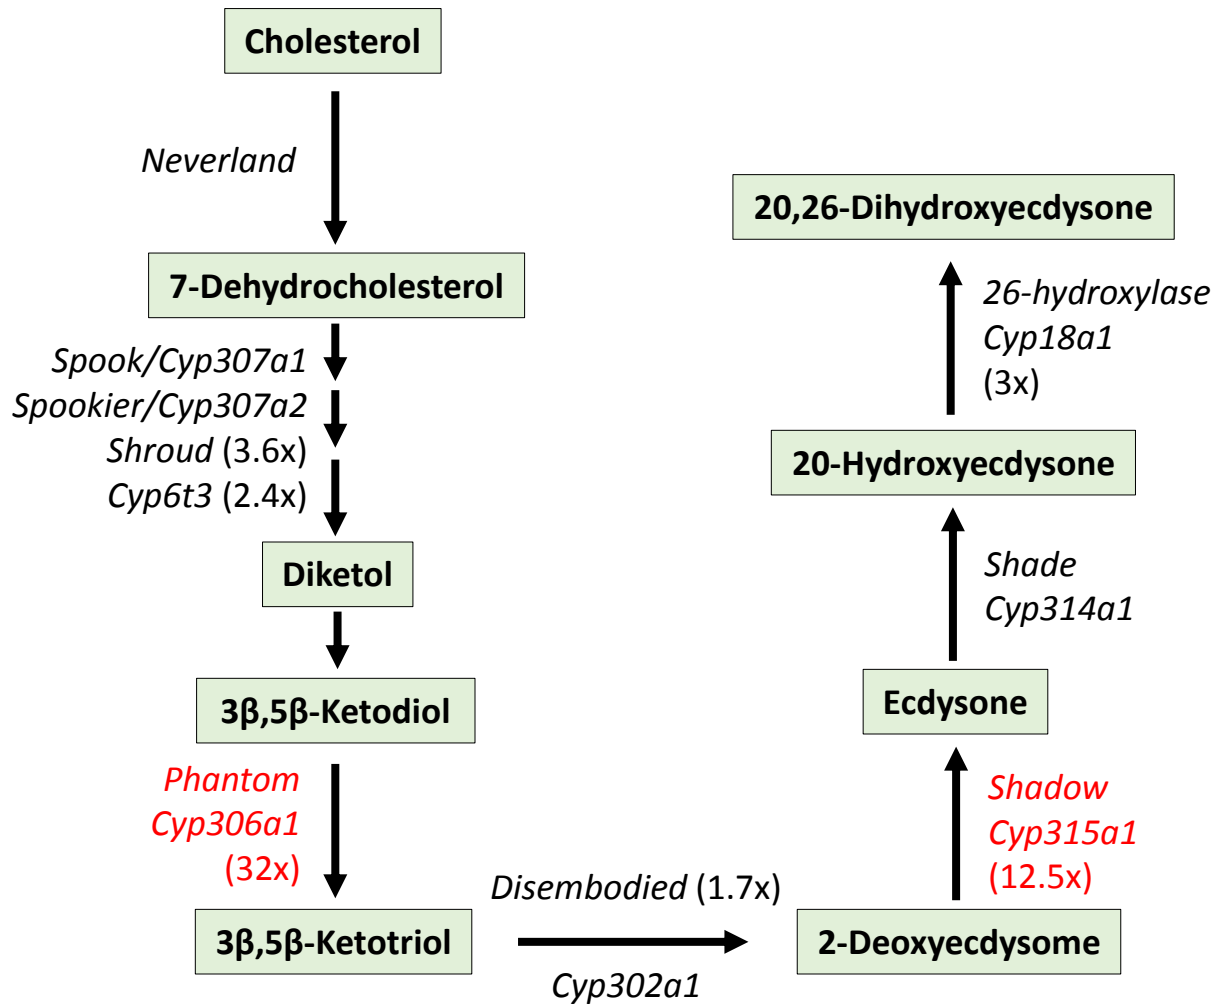

# Figure S3

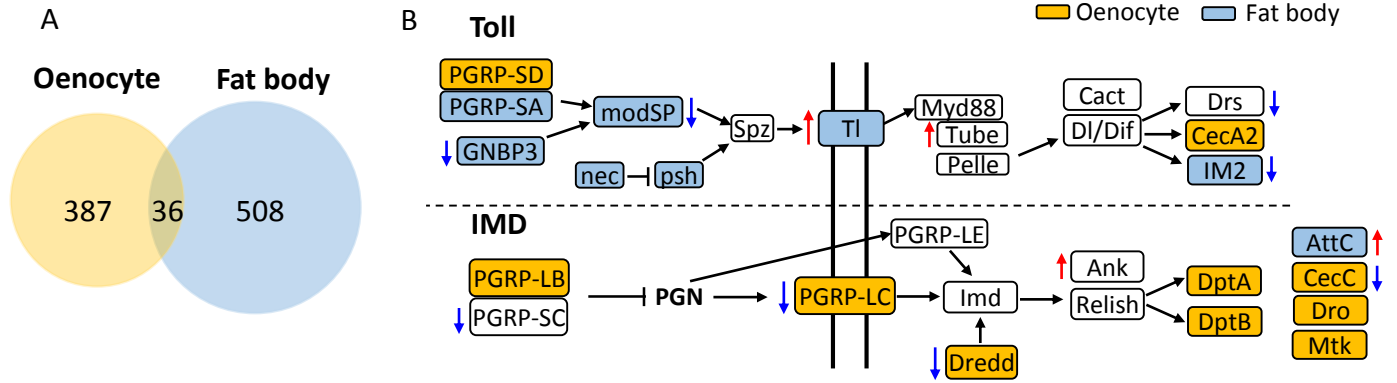

Figure S4

## 1. Peroxisome biogenesis and protein import

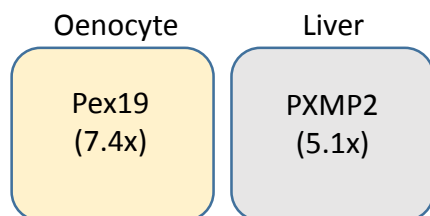

## 2. Peroxisome function

### Fatty acid beta-oxidation

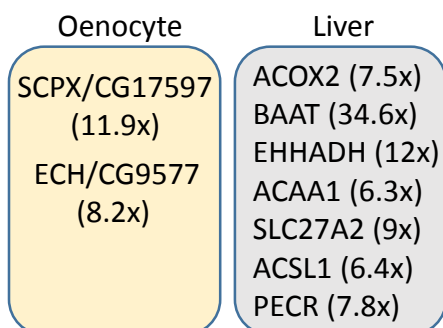

### Ether phospholipid biosynthesis

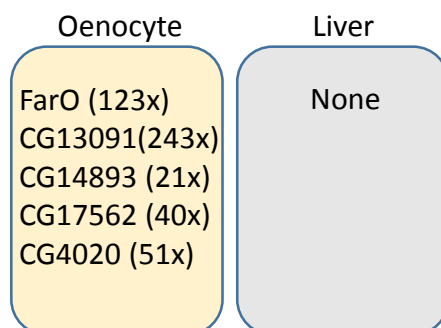

### ROS metabolism

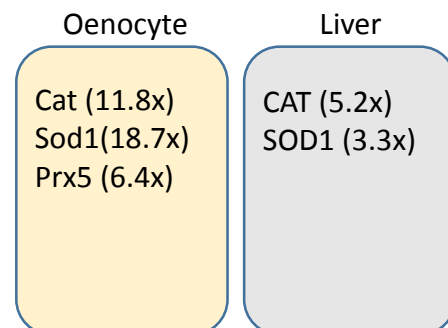

### Amino acid metabolism

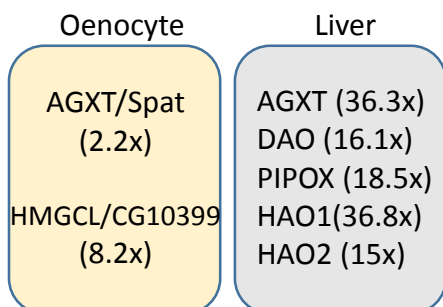

### Purine metabolism

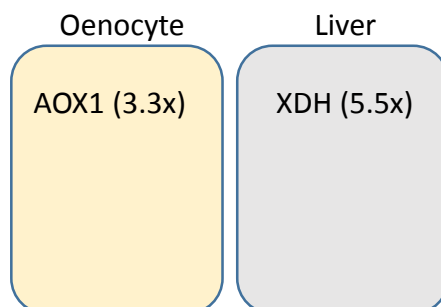

### Retinol metabolism

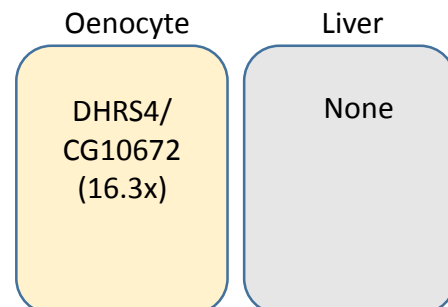

Source: https://www.biorxiv.org/content/10.1101/272179v2.full.pdf
